1 **Title**

2 Scalable Multi-Sample Single-Cell Data Analysis by Partition-Assisted Clustering and Multiple  
3 Alignments of Networks

4

5 **Authors**

6 Ye Henry Li<sup>a,\*</sup>, Dangna Li<sup>b,\*</sup>, Nikolay Samusik<sup>c</sup>, Xiaowei Wang<sup>d</sup>, Leying Guan<sup>d</sup>, Garry P. Nolan<sup>c</sup>, Wing  
7 Hung Wong<sup>d,e,1</sup>

8 \*Equal Contribution: Y.H.L and D.L.

9 <sup>1</sup>To whom correspondence should be addressed. Email: [whwong@stanford.edu](mailto:whwong@stanford.edu)

10

11 **Author Affiliations**

12

13 Ye Henry Li

14 <sup>a</sup>Structural Biology Department and Public Policy Program, Stanford University, Stanford, USA.

15

16 Dangna Li

17 <sup>b</sup>Institute for Computational and Mathematical Engineering, Stanford University, Stanford, USA.

18

19 Nikolay Samusik

20 <sup>c</sup>Department of Microbiology and Immunology, Baxter Laboratory, Stanford University, Stanford, USA

21

22 Garry P. Nolan

23 <sup>c</sup>Department of Microbiology and Immunology, Baxter Laboratory, Stanford University, Stanford, USA

24

25 Xiaowei Wang

26 <sup>d</sup>Statistics Department, Stanford University, Stanford, USA.

27 Leying Guan

28 <sup>d</sup>Statistics Department, Stanford University, Stanford, USA.

29

30 Wing Hung Wong

31 <sup>d</sup>Statistics Department, Stanford University, Stanford, USA.

32 <sup>e</sup>Department of Biomedical Data Science, Stanford University, Stanford, USA

33

#### 34 **Contributions**

35 Y.H.L. and W.H.W. conceived the project. Y.H.L., D.L., L.G. and W.H.W. designed the data analysis  
36 pipeline; Y.H.L. and D.L. implemented the data analysis pipeline. N.S. generated the hand-gated CyTOF  
37 data. Y.H.L., D.L., N.S., and X.W. analyzed the data. Y.H.L., D.L., N.S. and W.H.W. wrote the  
38 manuscript and developed the figures. G.P.N and W.H.W. supervised the study.

39

#### 40 **Conflict of Interest**

41 The authors declare no conflict of interest.

42

43

44

45

46

47

48

49

50

51

52

53

## 54 **Abstract**

55 Mass cytometry (CyTOF) has greatly expanded the capability of cytometry. It is now easy to generate  
56 multiple CyTOF datasets in a single study, with each dataset containing single-cell measurement on 50  
57 markers for hundreds of thousands cells. Current methods do not adequately address the issues  
58 concerning combining multiple samples for subpopulation discovery, and these issues can be quickly and  
59 dramatically amplified with increasing number of samples. To overcome this limitation, we developed  
60 Partition-Assisted Clustering and Multiple Alignments of Networks (PAC-MAN) for the fast  
61 identification of cell populations in CyTOF data closely matching that of expert manual-discovery, and  
62 for alignments between subpopulations across samples to define dataset-level cellular states. PAC-MAN  
63 is computationally efficient, allowing the management of very large CyTOF datasets, which are  
64 increasingly common in clinical studies and cancer studies that monitor various tissue samples for each  
65 subject.

66

## 67 **Introduction**

68 Analyses of CyTOF data rely on many of the tools and ideas from flow cytometry (FC) data analysis, as  
69 CyTOF datasets are essentially higher dimensional versions of flow cytometry datasets. Currently, the  
70 most widely used method in FC is still human hand-gating, as other methods often fail to extract  
71 meaningful subpopulations of cells automatically. In hand-gating, we draw polygons or other enclosures  
72 around pockets of cell events on a two-dimensional scatterplot to define subpopulations and cellular states  
73 that are observed in the data. This process is painfully time-consuming and requires advance knowledge  
74 of the marker panel design, the quality of the staining reagents, and, most importantly, *a priori* what cell  
75 subpopulations to expect to occur in the data. When presented with a new set of marker panels and  
76 biological system, the researcher would find it difficult to delineate the cell events, especially in high-  
77 dimensional and multiple-sample datasets.

78 The inefficient nature of hand-gating in flow cytometry motivated algorithmic development in automatic  
79 gating. Perhaps the most popular is flowMeans(1), which is optimized for FC and can learn  
80 subpopulations in FC data(2) in an automated manner; however, it has not been successfully applied to  
81 CyTOF data analysis. Currently, most data analysis tools created for flow cytometry data analyses are not  
82 easily applicable for high-dimensional datasets(3). An exception is SPADE, which was developed and  
83 optimized specifically for the analysis of CyTOF datasets(3). flowMeans and SPADE constitute the  
84 leading computation methods in cytometry, but as shown later in this work, their performance may  
85 become sub-optimal when challenged with large and high-dimensional cytometry data sets. There are also  
86 other recent clustering-based tools that utilize dimensionality reduction and projections of high-  
87 dimensional data, however, these tools do not directly learn the subpopulations for all the cell events, and  
88 may be too slow to complete data analysis for an increasing amount of samples.

89 In this study, we address the data analysis challenges in two major steps. First, we propose the partition-  
90 assisted clustering (PAC) approach, which produces a partition of the  $k$ -dimensional space ( $k$ =number of  
91 markers) that captures the essential characteristic of the data distribution. This partitioning methodology  
92 is grounded in a strong mathematical framework of partition-based high-dimensional density  
93 estimation(4–8). The mathematical framework offers the guarantee that these partitions approximate the

94 underlying empirical data distribution; this step is faster than the recent k-nearest neighbor-based method  
95 (9) and is essential to the scalability of our clustering approach to analyze datasets with many samples.  
96 The clustering of cells based on recursive partitioning is then refined by a small number of k-means style  
97 iterations before a merging step to produce the final clustering.

98 Secondly, the subpopulations learned separately in multiple different but related datasets can be aligned  
99 by marker network structures (multiple alignments of networks, or MAN), making it possible to  
100 characterize the relationships of subpopulations across different samples or related datasets. The ability to  
101 do so is critical for monitoring changes in a subpopulation across different conditions. Importantly, in  
102 every study, batch effect is present; batch effects shift subpopulation signals so that the means can be  
103 different from experiment to experiment. PAC-MAN naturally addresses batch effects in finding the  
104 alignments of the same or closely related subpopulations from different samples.

105 PAC-MAN finds homogeneous clusters efficiently with all data points in a scalable fashion and enables  
106 the matching of these clusters across different samples to discover cluster relationships in the form of  
107 clades.

108

## 109 **Results and Discussion**

110

### 111 *PAC*

112 PAC has two parts: partitioning and post-processing. In the partitioning part of PAC, the data space is  
113 recursively divided into smaller hyper-rectangles based on the number of data points in the locality  
114 (Figure 1a). The partitioning is accomplished by either Bayesian Sequential Partition (BSP) with limited  
115 look-ahead (Figure 1a and 1b) or Discrepancy Sequential Partition (DSP) (Figure 1a); these are two fast  
116 variants of partition-based density estimation methods previously developed by our group (4–8), with  
117 DSP being the fastest. BSP and DSP divide the sample space into hyper-rectangles with uniform density  
118 value in each of them. The subsetting of cells according to the partitioning provides a principled way of  
119 clustering the cells that reflects the characteristics of the underlying distribution. In particular, each  
120 significant mode is captured by a number of closely located rectangles with high-density values (Figure  
121 1c). Although this method allows a fast and unbiased localization of the high-density regions of the data  
122 space, we should not use the hyper-rectangles directly to define the final cluster boundaries for two  
123 reasons. First, real clusters are likely to be shaped elliptically, therefore, the data points in the corners of a  
124 hyper-rectangle are likely to be incorrectly clustered. Second, a real cluster is often split into more than  
125 one closely located high-density rectangles. We designed post-processing steps to overcome these  
126 limitations: 1) a small number of k-means iterations is used to round out the corners of the hyper-  
127 rectangles, 2) a merging process is implemented to ameliorate the splitting problem, which is inspired by  
128 the flowMeans algorithm. The details of post-processing are given in Materials and Methods. The  
129 resulting method is named b-PAC or d-PAC depending on whether the partition is produced by BSP or  
130 DSP.

131

132 *MAN*

133 An approach to analyze multiple related samples of CyTOF data is to pool all samples into a combined  
134 sample before detection of subpopulations. This is a natural approach under the assumptions that there are  
135 no significant batch effects or systematic shifts in cell subpopulations across the different samples.  
136 However, such assumptions may not hold due to one or more of the following reasons:

- 137 1) Dataset size and instruments used. Large number of samples usually means the samples were  
138 collected on different days with different experimental preparations. Many steps can introduce  
139 significant shifts in measurement levels.
- 140 2) Staining reagents. Reagents such as antibodies, purchased from different vendors and batch  
141 preparations can affect the overall signal. While saturation of reagents in the protocol could help  
142 eliminate the batch effects in the staining procedure, this approach is costly and might not work  
143 for all antibodies, especially those with poor specificity.
- 144 3) Normalization beads stock. While normalization beads(10) help to control for the signal level,  
145 especially within one experiment, the age of the beads stock and their preparation could lead to  
146 significant batch effects. In addition, there are different types of normalization beads and  
147 normalization calculations.
- 148 4) Human work variation. While many researchers are studying the same system (e.g., immune  
149 system), different protocols and implementation by different researchers, who sometimes perform  
150 experimental steps slightly differently, can lead to batch effects.
- 151 5) Subpopulation dynamics. The subpopulation centers can move from sample to sample due to  
152 treatments on the cells in treatment-control studies or perturbation studies. General practice is to  
153 cluster by phenotypic markers.
- 154 6) Sample background. If the data came from different cell lines or individuals in a clinical study,  
155 the measurement levels and proportions of cell subpopulations would be expected to change from  
156 sample to sample. Without expert scrutiny, it would be difficult to make sense of the data with  
157 current data analysis tools.

158 Could we extract shared information that allows us to interpret cross-sample similarities and differences?  
159 To ameliorate these difficulties, we have designed an alternative approach that is effective in the presence  
160 of substantial systematic between-sample variation. In this approach, each sample is analyzed separately  
161 (by PAC) to discover within-sample subpopulations. Over-partitioning in this step is allowed in order not  
162 to miss small subpopulations. The subpopulations from all samples are then compared to each other based  
163 on a pairwise dissimilarity measure designed to capture the differences in within-sample distributions  
164 (among the markers) across two subpopulations. Using this dissimilarity, we perform bottom-up  
165 hierarchical clustering of the subpopulations to represent the relationship among the subpopulations. The  
166 resulting tree of subpopulations is then used to guide the merging of subpopulations from the same  
167 sample, and to establish linkage of related subpopulations from different samples. We note that the design  
168 of a dissimilarity measure (Materials and Method) that is not sensitive to systematic sample-to-sample  
169 variation is a novel aspect of our approach. The merging of subpopulations from the same sample is also  
170 important, as it offers a way to correct any over-partitioning that may have occurred during the initial  
171 PAC analysis of each sample. We emphasize that, as with the usage of all statistical methods, the user  
172 must utilize samples or datasets that are considered as good as possible; interpretation of the analysis  
173 results rely on the researchers to collect data with validated reagents for all samples.

174

175 *Rational initialization for PAC increases clustering effectiveness*

176 Appropriate initialization of clustering is very important for eventually finding the optimal clustering  
177 labels; PAC works well because the implicit density estimation procedure yields rational centers to learn  
178 the modes of sample subpopulations. When tested on the hand-gated CyTOF data on the bone marrow  
179 sample in (14), compared to k-means alone, PAC gives lower total sums of squares and higher F-  
180 measures in the subpopulations (Figure 1d and 1e). This process also helps PAC to converge in 50  
181 iterations (Figure 1f) in post-processing, whereas k-means performs very poorly even after 5000 iterations  
182 (Figure 1g). Through the lens of t-sne plots (Figure 1g), the PAC results are more similar to the hand-  
183 gating results, while the k-means, flowMeans, and SPADE clustering results perform poorly. In  
184 flowMeans, several large subpopulations are merged. SPADE's separation of points is inconsistent and  
185 highly heterogeneous, probably due to its down-sampling nature. On the other hand, by inspection, PAC  
186 obtains similar separation for both the major and minor subpopulations as the hand-gating results.

187

188 *PAC is consistently better than flowMeans and SPADE for simulated datasets and hand-gated cytometry*  
189 *datasets*

190 In the systematic simulation study, we challenged the methods with different datasets with varying  
191 number of dimensions, number of subpopulations, and separation between the subpopulations. The F-  
192 measure and p-measures for the PAC methods are consistently equal or higher than that of flowMeans  
193 and SPADE (Table 1 and Supporting Figure 2a). In addition, we observe that flowMeans gives  
194 inconsistent F-measures for similar datasets (Table 1), which may be due to the convergence of k-means  
195 to a local minimum without a rational initialization.

196 Next, we tested the methods based on published hand-gated cytometry datasets to see how similar the  
197 estimated subpopulations are to those obtained by human experts. We applied the methods on the  
198 hematopoietic stem cell transplant and Normal Donors datasets from the FlowCAP challenges(2) and on  
199 the subset of gated mouse bone marrow CyTOF dataset (Dataset 5) recently published(11). The gating  
200 strategy of the CyTOF dataset is provided in Supporting Figure 1. The dataset and expert gating strategy  
201 are the same as described earlier(12). Note that in the flow cytometry data, the computed F-measures are  
202 slightly lower than that reported in FlowCAP; this is due to the difference in the definition of F-measures.  
203 Overall, the PAC outperforms flowMeans and SPADE by consistently obtaining higher F-measures  
204 (Table 1). In particular, in the CyTOF data example, PAC generated significantly higher F-measures  
205 (greater than 0.82) than flowMeans and SPADE (0.59 and 0.53, respectively). In addition, PAC gives  
206 higher overall subpopulation-specific purities (Supporting Figure 2b and Supporting Table 1). These  
207 results indicate that PAC gives consistently good results for both low and high-dimensional datasets.  
208 Furthermore, PAC results match human hand-gating results very well. The consistency between PAC-  
209 MAN results and hand-gating results in this large data set confirms the practical utility of the  
210 methodology.

211

212 *Separate-then-combine outperforms Pool Approach when Batch Effect is present*

213 It is natural to analyze samples separately then combine the subpopulation features for downstream  
214 analysis in the multiple samples setting. However, we need to resolve the batch effects.  
215 Two distinct subpopulations could overlap in the combined/pooled sample, such as in the case when the  
216 data came from two generations of CyTOF instruments (newer instrument elevates the signals). On the  
217 other hand, in cases with changing means, two subpopulations can evolve together such that their means  
218 change slightly, but enough to shadow each other when samples are merged prior to clustering.

219 First, we consider the overlapping scenario (Figure 2b). When viewed together in the merged sample, the  
220 right subpopulation from sample 1 overlaps with the left subpopulation in sample 2 (Figure 2c). There is  
221 no way to use expression level alone to delineate the two overlapping subpopulations (Figure 2d). By  
222 learning more subpopulations using PAC, there are some hints that multiple subpopulations are present  
223 (Figure 2e). Despite these hints, it would not be possible to say whether the shadowed subpopulations  
224 relate in any way to other distinct subpopulations.

225 PAC-MAN resolves the overlapping issue by analyzing the samples separately (Figure 2f). Considering  
226 the case in which we do not know *a priori* the number of true subpopulations, we learn three  
227 subpopulations per sample. The network structures of the subpopulations discovered are presented in  
228 Figure 2g and we see that the third subpopulations from the two samples share the same network  
229 structures, while the first subpopulations of the two samples differ by only one edge; these respective  
230 networks are clustered together in the dendrogram (Figure 2h, bottom panel). By utilizing the gene  
231 networks, the clades that represent the same and/or similar subpopulations of cells can be established.  
232 Clustering by network structures alone resolves the majority of points in the data (Figure 2h, top panel).  
233 Furthermore, as discussed next, by incorporating marker levels into the alignment process, all the points  
234 can be resolved (Figure 2i).

235 Next we consider the case with dynamic evolution of subpopulations that models the treatment-control  
236 and perturbation studies. The interesting information is in tracking how subpopulations change over the  
237 course of the experiment. In the simulation, we have generated two subpopulations that nearly converge  
238 in mean expression profile over the time course (Figure 3a). The researcher could lose the dynamic  
239 information if they were to combine the samples for clustering analysis. As in the previous case, we could  
240 use PAC to learn several subpopulations per sample (Figure 3b). Then, with the assumption that there are  
241 two evolving clusters from data exploration, we align the subpopulations to construct clades of same  
242 and/or similar subpopulations (Figure 3c) based on the network structural information (Supporting Figure  
243 3). With network and expression level information in the alignment process, the two subpopulations or  
244 clades can be resolved naturally (Figure 3c).

245

246 *Network and expression alignment is better than network or expression alignment alone*

247 With networks in hand, we could further characterize the relationships between subpopulations across  
248 samples. However, the alignment process needs to work well for true linkage to be established. We could  
249 align by network alone, by expression (or marker) means, or both. Figures 2h, 2i, and 3c present these  
250 alternatives in comparison. By using all the subpopulation networks, the results still contain subsets of  
251 misplaced cells (Figures 2h top panel and 3c left panel). This is because small clusters of cells have noisy  
252 underlying covariance structure; therefore, the networks cannot be accurately inferred. These structural



253 inaccuracies negatively impact the network clustering. The (mean) marker level approach also does not  
254 work well (Figure 3c center panel) due to the subpopulation mean shifts across samples. On the other  
255 hand, the sequential approach works well (Figures 2i and 3c right panel). In the sequential approach,  
256 larger (>1500 in batch effect case; >1000 in dynamic case) subpopulations' networks are utilized for the  
257 initially alignment process. Next, the smaller subpopulations, which have noisy covariance, are merged  
258 with the closest larger, aligned subpopulations. Thus, more subpopulations could be discovered upstream  
259 (in PAC), and the network alignment would work similarly as the smaller subpopulations, which could be  
260 fragments of a distribution, do not impact the alignment process (Supporting Figure 4a and b). Moreover,  
261 in the network inference step, unimportant edges can negatively impact the alignment process (Supporting  
262 Figure 4c) in the network-alone case. Biologically, this means that edges that do not constrain or define  
263 the cellular state should not be utilized in the alignment of cellular states. Effectively, the threshold placed  
264 on the number of edges in the network inference controls for the importance of the edges. Thus, the  
265 combined alignment approach works well and allows moderate over-saturation of cellular states to be  
266 discovered in the PAC step so that no advance knowledge of the exact number of subpopulations is  
267 necessary.

268

269 *PAC-MAN efficiently outputs meaningful data-level subpopulations for mouse tissue dataset*

270 We use the recently published mouse tissue dataset(11) to illustrate the multi-sample data analysis  
271 pipeline. The processed dataset contains a total of more than 13 million cell events in 10 different tissue  
272 samples, and 39 markers per event (Supporting Table 2). The original research results centered on  
273 subpopulations discovered from hand-gating the bone marrow tissue data to find 'landmark'  
274 subpopulations; the rest of the data points were clustered to the most similar landmark subpopulations.  
275 While this enables the exploration of the overall landscape from the perspective of bone marrow cell  
276 types, a significant amount of useful information from the data remains hidden.

277 In contrast, using d-PAC-MAN, the fastest approach by our comparison results, we can perform  
278 subpopulation discovery for each sample automatically and then align the subpopulations across samples  
279 to establish dataset-level cellular states. On a standard Core i7-44880 3.40GHz PC computer, the single-  
280 thread data analysis process with all data points takes about one hour to complete, which is much faster  
281 than alternative methods. With multi-threading and parallel processing, the data analysis procedure can be  
282 completed very quickly. As mentioned earlier, PAC results for the bone marrow subsetted data from this  
283 dataset matches closely to that of the hand-gated results. This accuracy provides confidence for applying  
284 PAC to the rest of the dataset.

285 Figure 4 shows the t-sne plots for subpopulation discovered (top panel of each sample) and the  
286 representative subpopulation established (bottom panel of each sample) for the entire dataset. In the PAC  
287 discovery step, we learn 35 subpopulations per sample without advance knowledge of how many  
288 subpopulations are present. This moderate over-partitioning of the data samples leads to a moderate  
289 heterogeneity in the t-sne plots. Next, the networks are inferred for the larger subpopulations (with  
290 number of cell events greater than 1000), and the networks are aligned for all the tissue samples. We  
291 output 80 representative subpopulations or clades for the entire dataset to account for the traditional  
292 immunology cellular states and sample-specific cellular states present. Within samples, the  
293 subpopulations that cluster together by network structure are aggregated. The smaller subpopulations (not



294 involved in network alignment) are either merged to the closet larger subpopulation or establish their own  
295 sample-specific subpopulation by expression alignment; small subpopulations were clamped with larger  
296 clades by grouping the subpopulations into 5 clusters per sample based on the means (of marker signal).  
297 The representative subpopulations (90 total) follow the approximate distribution of the cell events on the  
298 t-sne plots and the aggregating effect cleans up the heterogeneities due to over-partitioning in the PAC  
299 step.

300 The cell type clades are the representative subpopulations for the entire dataset, and they could either be  
301 present across samples or in one sample alone. Their distribution is visualized by a heatmap (Figure 5).  
302 While the bone marrow sample contains many cell types, only a subset of them are directly aligned to cell  
303 types in other samples, which means using the bone marrow data as the reference point leaves much  
304 information unlocked in the dataset. The cell types in the blood and spleen samples have more alignments  
305 with cell types in other samples. The lymph node samples share many clades; the small intestine and  
306 colon samples also share many clades, probably due to closeness in biological function. The thymus  
307 sample has few clades shared with other samples, which may be due to its functional specificity.

308 PAC-MAN style analysis can be applied to align the tissue subpopulations by their means instead of  
309 network similarities (Supporting Figure 5). As done previously, representative clades (88 total) were  
310 outputted. The same aggregating effect is observed (Supporting Figure 5a), and this is due to the  
311 organization from dataset-level variation in the means. Comparing to the network alignment, the means  
312 linkage approach has slightly more subpopulations per sample; the subpopulation proportion heatmap  
313 (Supporting Figure 5b) shows more linking. Although the bone marrow sample subpopulations co-occur  
314 in the same clades slightly more with other sample subpopulations, this sample does not co-occur with  
315 many clades in the dataset. Thus, a PAC-MAN style analysis with means linkage also harvests additional  
316 information from the entire dataset.

317 To compare the network and means approaches with PAC-MAN, we study the F-measure and p-measure  
318 results with 88 total clades from each approach. The overall F-measure with all cell events is 0.7969 and  
319 the overall F-measure with clades assignments of PAC-discovered subpopulations is 0.3143. The two F-  
320 measure values suggest that the assignment of PAC-discovered subpopulations is more consistent for  
321 larger subpopulations.

322 To illustrate the assignment purities, the p-measures are computed for the following two cases. 1)  
323 Network clade assignment is the basis (network-justified), similar to the ground truth in the clustering  
324 comparisons previously; or 2) means clade assignment is the basis (means-justified) (Supporting Table 4).  
325 P-measure cutoff is set at 0.3 (to remove unreliable comparisons) to obtain purer clade assignments. In the  
326 network-justified case, PAC subpopulations with more than 0.3 in p-measure constitute 93.44 % of all  
327 cell events. In the means-justified case, PAC subpopulations with more than 0.3 in p-measure constitute  
328 92.67 % of all cell events. Furthermore, if the p-measure cutoff were to increase to 0.5, the percentages of  
329 cells left for the network-justified and mean-justified cases are 6.25% and 75.16%, respectively. The  
330 network-justified case yields drastically lower numbers of cell events in the purer PAC subpopulations  
331 because the means approach has more heterogeneity in the linkages (defined as PAC-subpopulation  
332 participants in each shared clade with size of at least 2). In fact, the network approach has 100 linkages  
333 while the means approach has 209 linkages. Therefore, the extra linkages in the means approach would  
334 yield greater impurities in the network-justified case. The linkage plot (Supporting Figure 6a) shows that

335 the low linkages occur slightly more frequently for the network approach. One consequence is that the  
336 network approach aggregates PAC subpopulations within sample more frequently; for instance, in the  
337 thymus sample, the network approach yields 14 clades while the means approach yields 21 clades.

338 After aggregating, the clade sizes (with unique participants per sample) are plotted (Supporting Figure  
339 6b). The network approach tends to find fewer linkages, as more clades have sizes of less than 4, while  
340 the means approach has more clades than the network approach with clade sizes greater than 4. The  
341 network approach is more conservative due to the additional constraints from network structures.  
342 Conventionally, in the cytometry field, only the means are considered in the definition of cellular states.  
343 Assuming the absence of batch and dynamic effects, the researcher could view the purer shared clade  
344 assignments in the network-justified case (general agreement between constrained network approach and  
345 means approach) as more reliable candidates of cross-sample relationships to investigate in future  
346 experiments (Supporting Figure 6c).

347 Hence, the network alignment approach is in agreement that of the means approach, with network  
348 alignment being more stringent in the establishment of linkages. The network PAC-MAN approach  
349 defines cellular states with the additional information from network structures, and it has the effect of  
350 constraining the number of linkages between samples while finding linkages for subpopulations that are  
351 distant in their means.

352

353 *Network hubs provide natural annotations*

354 To further characterize the cell types, we annotate the clades within each sample using the top network  
355 hub markers, which constrain the cellular states. The full annotation, along with mean average expression  
356 profiles, is presented in Supporting Table 3. The clade information is presented in the ClusterID column.  
357 The annotations for cells across different samples but within the same clades share hub markers. For  
358 example, in clade 1 for the blood and bone marrow samples, the cells share the hub markers Ly6C and  
359 CD11b. In the bone marrow sample, one important set of subpopulations is the hematopoietic stem cell  
360 subpopulations. One such subpopulation is present as clade 18 with the annotation CD34-CD27-cKit-  
361 Sca1 and is about 1.87 percent in the bone marrow sample. Clade 18 is only present in the bone marrow  
362 sample, indicating that the PAC-MAN pipeline defines this as a sample-specific and coherent  
363 subpopulation using dataset-level variation. The thymus contains a large subpopulation (84.07 percent)  
364 that is characterized as CD5-CD4-CD43-CD3, suggesting it to be the maturing T-cell subpopulation.

365

## 366 **Conclusion**

367 We have presented the PAC-MAN data analysis pipeline. This pipeline was designed to remove major  
368 roadblocks in the utilization of existing and future CyTOF datasets. First, we established a quick and  
369 accurate clustering method that closely matches expert gating results; second, we demonstrated the  
370 management of multiple samples by handling mean shifts and batch effects across samples. The  
371 alignment allows researchers to find relationships between cells across samples without resorting to  
372 pooling of all data points. This pipeline can be efficiently utilized to analyze large datasets of high-

373 dimension. PAC-MAN allows the cytometry field to harvest information from the increasing amount of  
374 CyTOF data available.

375

## 376 **Materials and Methods**

377

378 *Partition-assisted clustering has two parts*

379 1) Partitioning: a partition method (BSP(5) or DSP(7)) is used to learn N initial cluster centers from the  
380 original data.

381 2) Post-processing: A small number (m) of k-mean iterations is applied to the rectangle-based clusters  
382 from the partitioning, where m is a user-specified number. We used m=50 in our examples. After this k-  
383 means refinement, we merge the N clusters hierarchically until the desired number of clusters (this  
384 number is user-specified) is reached. The merging is based on a given distance metric for clusters. In the  
385 current implementation, we use the same distant metric as in flowMeans(1). That is, for two clusters X  
386 and Y, their distance  $D(X, Y)$  is defined as:

$$D(X, Y) = \min \{(\bar{x} - \bar{y})^T S_x^{-1} (\bar{x} - \bar{y}), (\bar{x} - \bar{y})^T S_y^{-1} (\bar{x} - \bar{y})\}$$

387 where  $\bar{x}, \bar{y}$  are the sample mean of cluster X and Y, respectively.  $S_x^{-1}$  is the inverse of the sample  
388 covariance matrix of cluster X.  $S_y^{-1}$  is defined similarly. In each step of the merging process, the two  
389 clusters having the smallest pairwise distance will be merged together into one cluster.

390

391 *Partition Methods*

392 There are two partition methods implemented in the comparison study: d-PAC and b-PAC. The results  
393 are similar, with d-PAC being the faster algorithm. Figure 1a illustrates this recursive process.

394 d-PAC is based on the discrepancy density estimation (DSP)(7). Discrepancy, which is widely used in the  
395 analysis of Quasi-Monte Carlo methods, is a metric for the uniformity of points within a rectangle. DSP  
396 partitions the density space recursively until the uniformity of points within each rectangle is higher than  
397 some pre-specified threshold. The dimension and the cut point of each partition are chosen to  
398 approximately maximize the gap in uniformity of two adjacent rectangles.

399 BSP + LL is an approximation inference algorithm for Bayesian sequential partitioning density estimation  
400 (BSP)(5). It borrows ideas from Limited-Look-ahead Optional Pólya Tree (LL-OPT), an approximate  
401 inference algorithm for Optional Pólya Tree(8). The original inference algorithm for BSP looks at one  
402 level ahead (i.e. looking at the possible cut points one level deeper) when computing the sampling  
403 probability for the next partition. It then uses resampling to prune away bad samples. Instead of looking at  
404 one level ahead, BSP + LL looks at h levels ahead ( $h > 1$ ) when computing the sampling probabilities for  
405 the next partition and does not do resampling (Figure 1b). In other words, it compensates the loss from

406 not performing resampling with more accurate sampling probabilities. For simplicity, ‘BSP + LL’ is  
407 shortened to ‘BSP’ in the rest of the article.

408

409 *F-measure*

410 We use the F-measure for comparison of clustering results to ground truth (known in simulated data, or  
411 provided by hand-gating in real data). This measure is computed by regarding a clustering result as a  
412 series of decisions, one for each pair of data points. A true positive decision assigns two points that are in  
413 the same class (i.e. same class according to ground truth) to the same cluster, while a true negative  
414 decision assigns two points in different classes to different clusters. The F-measure is defined as the  
415 harmonic mean of the precision and recall. Precision P and recall R are defined as:

416  $P = \frac{TP}{TP+FP}$ ,  $R = \frac{TP}{TP+FN}$ , where TP is the total number of true positives, FP is the total number of false  
417 positives and FN is the total number of false negatives.

418 F-measure ranges from 0 to 1. The higher the measure, the more similar the estimated cluster result is to  
419 the ground truth. This definition of F-measure is different than that of FlowCAP challenge(2). The use of  
420 co-assignment of labels in this definition is a more accurate way to compute the true positives and  
421 negatives.

422

423 *Purity-measure (p-measure)*

424 Most of the existing measurements for clustering accuracy aim at measuring the overall accuracy of the  
425 entire datasets, i.e. comparing with the ground truth over all clusters. However, we are also interested in  
426 analyzing how well a clustering result matches the ground truth within a certain class. Specifically,  
427 consider a dataset D with K classes:  $\{C_1, C_2, \dots, C_K\}$  and a given ground truth cluster labels g, we construct  
428 an index called the purity measure, or p-measure for short, to measure how well our clustering result  
429 matches g for each class  $C_i$ . This index is computed as follows:

430 1) For each class  $C_k$ , look for the cluster that has the maximum number of overlapping points with this  
431 class, denoted by  $L_{i_k}$ .

432 2) Define  $S_1 = \frac{|C_k \cap L_{i_k}|}{|L_{i_k}|}$ ,  $S_2 = \frac{|C_k \cap L_{i_k}|}{|C_k|}$ , where  $|\cdot|$  denotes the number of points in a set.

433 3) The final P-index for class  $C_k$  is given by:  $P = \frac{2S_1S_2}{S_1+S_2}$ .

434 If we were to match a big cluster with a small class, even though the overlapping may be large,  $S_1$  would  
435 still be low since we have divided the score by the size of the cluster in  $S_1$ . In addition, we are interested  
436 in knowing how many points in  $C_k$  are clustered together by  $L_{i_k}$ , which is measured by  $S_2$ .

437

438 *Network construction and comparison*

439 After PAC, the discovered subpopulations typically have enough cells for the estimation of mutual  
440 information. This enables the construction of networks as the basis for cell type characterization.  
441 Computationally, it is not good to directly use the mutual information networks constructed this way to  
442 organize the subpopulations downstream. The distance measure used to characterize the networks could  
443 potentially give the same score for different network structures. Thus, it is necessary to threshold the  
444 network edges based on the strength of mutual information to filter out the noisy and miscellaneous  
445 edges. In this work, these subpopulation-specific networks are constructed using the MRNET network  
446 inference algorithm in the Parmigene (13) R package. The algorithm is based on mutual information  
447 ranking, and outputs significant edges connecting the markers. The top  $d$  edges ( $d$  is set to be 1x the  
448 number of markers in all examples) are used to define a network for the subpopulation. This process  
449 enables a careful calculation of the distance measure.

450 For each pair of subpopulation networks, we calculate a network distance, which is defined as follows. If  
451  $G_1$  and  $G_2$  are two networks, let  $S$  be the set of shared edges and  $A$  be union of the of the edges in the two  
452 networks, then we define

453 
$$\text{Similarity}(G_1, G_2) = \frac{|S|}{|A|}, \text{ where } |\cdot| \text{ denotes the size of a set.}$$

454 This is known as the Jaccard coefficient of the two graphs. The Jaccard distance, or 1- Jaccard coefficient,  
455 is then obtained. This is a representation of the dissimilarity between each pair of networks; the Jaccard  
456 dissimilarity is the measure used for the downstream hierarchical clustering.

457

458 *Cross-sample linkage of subpopulations*

459 We perform agglomerative clustering of the pool of subpopulations from all samples. This clustering  
460 procedure greedily links networks that are the closest in Jaccard dissimilarity, and yields a dendrogram  
461 describing the distance relationship between all the subpopulations. We cut the dendrogram to obtain the  
462  $k$  clades of subpopulations. Subpopulations from the same sample and falling into the same clade are then  
463 merged into a single subpopulation (Figure 2a). This merging step has the effect of correcting the over-  
464 partitioning in the PAC step. No merging is performed for subpopulations from different samples sharing  
465 the same clade. In this way, we obtain  $k$  clades of subpopulations, with each clade containing no more  
466 than one subpopulation from each sample. We regard the subpopulations within each clade as being  
467 linked across samples.

468 In the above computation, only subpopulations with enough cells to define a stable covariance are used  
469 for network alignment via the Jaccard distance; the rest of the cell events from very small subpopulations  
470 are then merged with the closet clade by marker profile via distance of mean marker signals. If the small  
471 subpopulations are distant from the defined clades, then a new sample-specific clade is created for these  
472 small subpopulations.

473

474 *Annotation of Subpopulations*

475 To annotate the cellular states, we first apply PAC-MAN to learn the dataset-level subpopulation/clade  
476 labels. Next, these labels are used to learn the representative/clade networks. The top hubs (i.e. the most  
477 connected nodes) in these networks are used for annotation. This approach has biological significance in  
478 that important markers in a cellular state are often central to the underlying marker network; these  
479 important markers have many connections with other markers. If the connections were broken, the cell  
480 would be perturbed and driven to other states.

481

#### 482 *Running Published Methods*

483 To run t-SNE (14) a dimensionality reduction visualization tool, we utilized the scripts published here  
484 (<https://lvdmaaten.github.io/tsne/>). Default settings were used.

485 To run SPADE, we first converted the simulated data to fcs format using Broad Institute's free  
486 CSVtoFCS online tool in GenePattern(15) (<http://www.broadinstitute.org/cancer/software/genepattern#>).

487 Next, we carried out the tests using the SPADE package in Bioconductor R(16)  
488 (<https://bioconductor.org/packages/release/bioc/html/spade.html>).

489 To run flowMeans, we carried out the tests using the flowMeans package in Bioconductor R(1)  
490 (<https://bioconductor.org/packages/release/bioc/html/flowMeans.html>).

491 In the comparisons, we selected only cases that work for all methods to make the tests as fair as possible.

492 To calculate the mutual information of the subpopulations, we use the infotheo R package (<https://cran.r-project.org/web/packages/infotheo/index.html>)  
493

494 To run network inference, we use the mrnet algorithm in the parmigne R package (13).  
495 (<https://www.bioconductor.org/packages/release/bioc/html/minet.html>).

496

#### 497 *Code Availability*

498 The PAC R package can be accessed at:

499 <https://cran.r-project.org/web/packages/PAC/index.html>

500

#### 501 *Simulated Data for Clustering Analysis*

502 To compare the clustering methods, we generated simulated data from Gaussian Mixture Model varying  
503 dimension, the number of mixture components, mean, and covariance. The dimensions range from 5 to  
504 39. The number of mixture components is varied along each dimension. The mean of each component  
505 was generated uniformly from a d-dimensional hypercube; we generated datasets using hypercube of  
506 different sizes, but kept all the other attributes the same. The covariance matrices were generated as  $AA^T$ ,



507 where  $A$  is a random matrix whose elements were independently drawn from the standard normal  
508 distribution. The sizes of the simulated dataset range from 100k to 200k.

509 The simulated data are provided as (Datasets 1-6). Datasets 1-4 are for the PAC part. Dataset 1 contains  
510 data with 5 dimensions; Dataset 2 contains data with 10 dimensions; Datasets 3a and 3b contain data with  
511 20 dimensions; and Datasets 4a and 4b contain data with 35 dimensions. The ground truth labels are  
512 included as separate sheets in each dataset.

513 When applying flowMeans, SPADE, and the PAC to the data, we preset the desired number of  
514 subpopulations to that in the data to allow for direct comparisons.

515

#### 516 *Gated Flow Cytometry Data*

517 Two data files were downloaded from the FlowCAP challenges(2). One data file is from the  
518 Hematopoietic stem cell transplant (HSCT) data set; it has 9,936 cell events with 6 markers, and human  
519 gating found 5 subpopulations. Another data file is from the Normal Donors (ND) data set; it has 60,418  
520 cell events with 12 markers, and human gating found 8 subpopulations. The files are the first (“001”) of  
521 each dataset. These data files were all 1) compensated, meaning that the spectral overlap is accounted for,  
522 2) transformed into linear space, and 3) pre-gated to remove irrelevant events. We used the data files  
523 without any further transformation and filtering. When applying flowMeans, SPADE, and the PAC to the  
524 data, we preset the desired number of subpopulations to that in the data to allow for direct comparisons.

525

#### 526 *Gated Mass Cytometry Data*

527 Human gated mass cytometry data was obtained by gating for the conventional immunology cell types  
528 using the mouse bone marrow data recently published(11). The expert gating strategy is provided as  
529 Supporting Figure 1. The gated sample subset contains 64,639 cell events with 39 markers and 24  
530 subpopulations and it is provided as Dataset 7.

531 To test the performance of different analysis methods, the data was first transformed using the  $\text{asinh}(x/5)$   
532 function, which is the transformation used prior to hand-gating analysis; For SPADE analysis, we utilize  
533 the  $\text{asinh}(x/5)$  option in the SPADE commands. The post-clustering results from flowMeans, SPADE, b-  
534 PAC, and d-PAC were then subsetted using the indexes of gated cell events. These subsetted results are  
535 compared to the hand-gated results.

536

#### 537 *Simulated Data for MAN Analysis*

538 To test the linking of subpopulations, we generated simulated data from multivariate Gaussian with preset  
539 signal levels and randomly generated positive definite covariance matrices. There are two cases, batch  
540 effect and dynamic. Each simulated sample file has five dimensions, with two of these varying in levels;  
541 these are the dimensions that are visualized. Dataset 5 contains the data for general batch effects case and

542 Dataset 6 contains the data for dynamic effects case. The ground truth labels are included as separate  
543 sheets in each dataset.

544

545 *General batch scenario.* Sample 1 represents data from an old instrument (instrument 1) while sample 2  
546 represents data from a new instrument (instrument 2). There are two subpopulations per sample. These  
547 two subpopulations are the same, but their mean marker levels shifted higher up in sample 2 due to higher  
548 sensitivity of instrument 2 (Figure 2b). The subpopulations have different underlying relationships  
549 between the markers. In this simulated experiment, five markers were measured. Out of the five markers,  
550 two markers show significant shift, and we focus on these two dimensions by 2-dimensional scatterplots.  
551 In Figure 2b, the left subpopulation in sample 1 is the same as the left subpopulation in sample 2; the  
552 same with the right subpopulation. The same subpopulations were generated from multivariate Gaussian  
553 distributions with changing means with fixed covariance structure.

554 *Dynamic scenario.* Dynamic scenario models the treatment-control and perturbation studies. In the  
555 simulation, we have generated two subpopulations that nearly converge over the time course (Figure 3a).  
556 The researcher could lose the dynamic information if they were to combine the samples for clustering  
557 analysis. The related subpopulations were generated from multivariate Gaussian distributions with  
558 changing means with fixed covariance structure.

559

#### 560 *Raw CyTOF Data Processing*

561 The researcher preprocesses the data to 1) normalize the values to normalization bead signals, 2) de-  
562 barcode the samples if multiple barcoded samples were stained and ran together, and 3) pre-gate to  
563 remove irrelevant cells and debris to clean up the data(10,17). Gene expressions look like log-normal  
564 distributions(18); given the lognormal nature of the values, the hyperbolic arcsine transform is applied to  
565 the data matrix to bring the measured marker levels (estimation of expression values) close to normality,  
566 while preserving all data points. Often, researchers use the  $\text{asinh}(x/5)$  transformation, and we use the same  
567 transformation for the CyTOF datasets analyzed in this study.

568

#### 569 *Mouse Tissue Data*

570 In the Spitzer et al., 2015 dataset(11), three mouse strains were grown, and cells were collected from  
571 different tissues: thymus, spleen, small intestine, mesenteric lymph node, lung, liver, inguinal lymph  
572 node, colon, bone marrow, and blood. In each experiment, 39 expression markers were monitored. The  
573 authors used the C57BL6 mouse strain as the reference(11); the data was downloaded from Cytobank,  
574 and we performed our analysis on the reference strain.

575 First, all individual samples were filtered by taking the top 95% of cells based on DNA content and then  
576 the top 95% of cells based on cisplatin: DNA content allows the extraction of good-quality cells and  
577 cisplatin level (low) allows the extraction of live cells. Overall, the top 90% of cell events were extracted.

578 The filtered samples were then transformed by the hyperbolic arcsine ( $x/5$ ) function, and merged as a  
579 single file, which contains 13,236,927 cell events and 39 markers per event (Supporting Table 2).

580 Using PAC-MAN, we obtained 35 subpopulations in each sample then 80 clades for the entire dataset.  
581 The 80 clades account for the traditional immune subpopulations and sample-specific subpopulations.  
582 Small subpopulations not used in alignment are later merged into the closest clades; this is done by  
583 performing hierarchical clustering with the marker signals to obtain 5 “expression” subclades per sample.  
584 Subsequently, any clade with less than 10 cells is discarded. Subpopulation proportion heatmap was  
585 plotted to visualize the subpopulation-specificities and relationships across the samples. Finally,  
586 annotation was performed using the hub markers of each representative subpopulation in each sample.

587

## 588 **Acknowledgements**

589 We thank the members of Wong Lab, in particular Tung-yu Wu, Chen-yu Tseng and Kun Yang, for  
590 critical feedback.

591 This research was supported by the Stanford SIGF-BioX fellowship and the T32 GM007276 grant to  
592 Y.H.L. and the NIH R01GM109836, NSF-DMS1330132, and NSF-DMS1407557 grants to W.H.W.

593

## 594 **References**

- 595 1. Aghaeepour N, Nikolic R, Hoos HH, Brinkman RR. Rapid cell population identification in flow  
596 cytometry data. *Cytometry A*. 2011 Jan 1;79A(1):6–13.
- 597 2. Aghaeepour N, Finak G, Consortium TF, Consortium TD, Hoos H, Mosmann TR, et al. Critical  
598 assessment of automated flow cytometry data analysis techniques. *Nat Methods*. 2013  
599 Mar;10(3):228–38.
- 600 3. Qiu P, Simonds EF, Bendall SC, Gibbs Jr KD, Bruggner RV, Linderman MD, et al. Extracting a  
601 cellular hierarchy from high-dimensional cytometry data with SPADE. *Nat Biotechnol*. 2011  
602 Oct;29(10):886–91.
- 603 4. Wong WH, Ma L. Optional Pólya tree and Bayesian inference. *Ann Stat*. 2010 Jun;38(3):1433–59.
- 604 5. Lu L, Jiang H, Wong WH. Multivariate Density Estimation by Bayesian Sequential Partitioning. *J*  
605 *Am Stat Assoc*. 2013 Dec 1;108(504):1402–10.
- 606 6. Yang K, Wong WH. Discovering and Visualizing Hierarchy in the Data. ArXiv14034370 *Stat*  
607 [Internet]. 2014 Mar 18 [cited 2015 Nov 27]; Available from: <http://arxiv.org/abs/1403.4370>
- 608 7. Yang K, Wong WH. Density Estimation via Adaptive Partition and Discrepancy Control.  
609 ArXiv14041425 *Stat* [Internet]. 2014 Apr 4 [cited 2015 Nov 27]; Available from:  
610 <http://arxiv.org/abs/1404.1425>
- 611 8. Jiang H, Mu JC, Yang K, Du C, Lu L, Wong WH. Computational Aspects of Optional Pólya Tree. *J*  
612 *Comput Graph Stat*. 2015 Feb 13;0(ja):00–00.

- 613 9. Samusik N, Good Z, Spitzer MH, Davis KL, Nolan GP. Automated mapping of phenotype space  
614 with single-cell data. *Nat Methods*. 2016 Jun;13(6):493–6.
- 615 10. Finck R, Simonds EF, Jager A, Krishnaswamy S, Sachs K, Fantl W, et al. Normalization of mass  
616 cytometry data with bead standards. *Cytometry A*. 2013 May 1;83A(5):483–94.
- 617 11. Spitzer MH, Gherardini PF, Fragiadakis GK, Bhattacharya N, Yuan RT, Hotson AN, et al. An  
618 interactive reference framework for modeling a dynamic immune system. *Science*. 2015 Jul  
619 10;349(6244):1259425.
- 620 12. Samusik N, Good Z, Spitzer MH, Davis KL, Nolan GP. Automated mapping of phenotype space  
621 with single-cell data. *Nat Methods*. 2016 Jun;13(6):493–6.
- 622 13. Sales G, Romualdi C. *parmigene*—a parallel R package for mutual information estimation and gene  
623 network reconstruction. *Bioinformatics*. 2011 Jul 1;27(13):1876–7.
- 624 14. Maaten L van der, Hinton G. Visualizing Data using t-SNE. *J Mach Learn Res*. 2008;9(Nov):2579–  
625 605.
- 626 15. Reich M, Liefeld T, Gould J, Lerner J, Tamayo P, Mesirov JP. GenePattern 2.0. *Nat Genet*. 2006  
627 May;38(5):500–1.
- 628 16. Linderman MD, Bjornson Z, Simonds EF, Qiu P, Bruggner RV, Sheode K, et al. CytoSPADE:  
629 high-performance analysis and visualization of high-dimensional cytometry data. *Bioinformatics*.  
630 2012 Sep 15;28(18):2400–1.
- 631 17. Zunder ER, Finck R, Behbehani GK, Amir ED, Krishnaswamy S, Gonzalez VD, et al. Palladium-  
632 based mass tag cell barcoding with a doublet-filtering scheme and single-cell deconvolution  
633 algorithm. *Nat Protoc*. 2015 Feb;10(2):316–33.
- 634 18. Bengtsson M, Ståhlberg A, Rorsman P, Kubista M. Gene expression profiling in single cells from  
635 the pancreatic islets of Langerhans reveals lognormal distribution of mRNA levels. *Genome Res*.  
636 2005 Oct 1;15(10):1388–92.
- 637
- 638

639 **Figure and Table Legends**

640

641 **Figure 1: PAC utilizes rational initialization for fast and accurate clustering convergence**

642 (a) Partition-based methods estimate data density by cutting the data space into smaller rectangles.  
643 Bayesian Sequential Partition (BSP) divides the data space via binary partition in the middle of the  
644 bounded region, while that of Discrepancy Sequential Partition (DSP) occur at the location that balances  
645 the data point uniformly on both sides of the cut. The numbers denote sequential order of partitions. Since  
646 DSP adapts to the data points, it converges on the estimated density faster than BSP. (b) In the (one-step)  
647 look-ahead of version of partition, the algorithm cuts the data space for all potential cuts plus one step  
648 more (steps 2 and 3), and it finds the optimal future version (after step 3), which determines the actual cut  
649 (step 2). (c) The partitioning of simulated data space containing five subpopulations; the hyper-rectangles  
650 surround high-density areas, approximating the underlying distribution. (d-e) The rational initialization  
651 step helps PAC to outperform random initialization. The handgated CyTOF data was used. In this case,  
652 the overall sum of squares error is lower and the F-measure is higher for PAC. (f) The convergence of  
653 PAC toward the hand-gated results, or ground truth, is fast. It takes less than 50 downstream post-  
654 processing kmeans iterations for the PAC to achieve a significantly higher F-measure than the alternative  
655 methods. In contrast, flowMeans convergence is poor. (g) Visualization of clustering results with t-sne  
656 plot. The t-sne plots contain 10,000 cell events of the handgated CyTOF data with different set of labels  
657 drawn. Note that the colors are informative only within each panel. These labels are from kmeans,  
658 SPADE, flowMeans, b-PAC, and d-PAC. The subpopulation numbers for all methods were set to be the  
659 same as that of handgated results.

660

661 **Figure 2: Overlapping batch effects can be resolved by PAC-MAN**

662 (a) Schematic of MAN. Consider a deck of networks (in analogy to cards), with each “suit” representing a  
663 sample and each “rank” representing a unique network structure. The networks are aligned by similarity  
664 and organized on a dendrogram. The tree is cut (red line) at the user-specified level to output the desired  $k$   
665 clades. Within each clade, the network structures are similar or the same. If the same sample has multiple  
666 networks in the same clade, then these networks are merged (black box around same cards). (b) Simulated  
667 data samples with two of the same subpopulations. The means shifted due to measurement batch effect.  
668 (c) When the samples are combined, as in the case of analyzing all samples together, two different  
669 subpopulations overlap. (d) The overlapped subpopulations cannot be distinguished by clustering. (e)  
670 PAC could be used to discover more subpopulations, however, the hints of the present of another  
671 subpopulation do not help to resolve the batch effect. (f) PAC was used to discover several  
672 subpopulations per sample without advanced knowledge of the exact number of subpopulations. (g) The  
673 networks of the subpopulations discovered in (f). Networks can be grouped by similarities to organize the  
674 subpopulations across samples; the alignment is based on Jaccard dissimilarity network structure  
675 characterization matrix; dendrogram of the hierarchical clustering results. (h) Resolution of batch effect  
676 by networks of all subpopulations discovered. (i) Resolution of batch effect first by gene networks of  
677 larger subpopulations and then by merging smaller subpopulations into the aligned clades.

678

679 **Figure 3: Dynamic information can be extracted by PAC-MAN**

680 (a) Ground truth of simulated samples. Two subpopulations, in blue color, almost converge in time by  
681 mean shifts. (b) PAC discovers several subpopulations per sample without advanced knowledge of the  
682 number of subpopulations present. (c) Comparison of PAC-MAN results between representative clades  
683 (number of clades set to 2). Using gene networks and expression information alone do not resolve the  
684 dynamic information. On the other hand, dynamic information is resolved first by gene networks of larger  
685 subpopulations and then by merging smaller subpopulations into the aligned clades.

686

687 **Figure 4: Mouse tissue data analysis results visualized by t-sne plots.**

688 Each t-sne plot was generated using 10,000 randomly drawn cell events from each mouse tissue sample.  
689 The results from PAC (top panel) and MAN (bottom panel) steps are presented as a pair. Initial PAC  
690 discovery was set to 35 subpopulations without advanced knowledge of the number of subpopulations in  
691 each sample. In MAN, 80 network clades were outputted, and the cellular states are defined by gene  
692 expression, network structure, and dataset-level variation. This composite definition naturally aggregates  
693 the initial 35 subpopulations to yield smaller number of subpopulations in less variable samples.

694

695 **Figure 5: Clade proportions and annotation**

696 Heatmap of clade proportions across the samples. Sample-specific clades have a value of 1, while shared  
697 clades have proportions spread across different samples. Physiologically similar samples share more  
698 clades.

699

700 **Supporting Figure 1: Gating strategy of CyTOF data for methods comparison**

701 Biaxial gating hierarchy for the mouse bone marrow CyTOF dataset. Gating strategy that was used to find  
702 24 reference populations in the mouse bone marrow CyTOF data. Pre-gating step involved removal of  
703 doublets, dead cells, erythrocytes and neutrophils. Non-neutrophils population was either subject to  
704 cluster analysis by computational tools or subsequent gating. Dotted boxes represent 24 terminal gates  
705 that were selected as reference populations for the comparison analysis.

706

707 **Supporting Figure 2: Subpopulation purity of simulated and real CyTOF data**

708 (a) Subpopulation-specific purity plot of 35-dimensional simulated data with 10 subpopulations. The blue  
709 points denote the differences between the p-measures of the partition-based method (either d-PAC or b-  
710 PAC) and flowMeans, while the red points denote the p-measure differences between the partition  
711 methods and SPADE. The horizontal line at 0 means no difference between the methods. Most of the blue



712 and red points are above 0, indicating that the PAC generates purer subpopulations compared to the  
713 ground truth. The two subplots are very similar, which means that d-PAC and b-PAC give very similar p-  
714 measures. More precisely, the sum of differences between d-PAC and flowMeans and d-PAC and  
715 SPADE are 0.85 and 1.09, respectively; and the overall difference between b-PAC and flowMeans and b-  
716 PAC and SPADE are 0.84 and 1.08, respectively.

717 (b) Subpopulation-specific purity plot of the hand-gated CyTOF data. The same convention is used as in  
718 (Supporting Figure 2a). Again, more blue and red points are above 0, indicating that the partition-based  
719 methods generate purer subpopulations compared to the ground truth. There is a cluster of points below 0  
720 occurring in the middle of the plot, suggesting that flowMeans and SPADE capture the mid-size  
721 subpopulations more similar to hand-gating than the partition-based methods. More specifically,  
722 flowMeans does better (p-measure difference of 0.1 or better; difference of less 0.1 is considered  
723 practically no difference) with finding subpopulations of GMP, CD8 T cells, MEP, CD4 T cells  
724 (compared to d-PAC), and Plasma cells, while SPADE does better with CD19+IgM- B cells, NK cells  
725 (compared to d-PAC), CD8 T cells, NKT cells, Basophils, Short-Term HSC, and Plasma cells. However,  
726 overall, PAC has a much better performance, as the absolute sum of points above 0 is higher than that of  
727 points below 0. More precisely, the sum of differences between d-PAC and flowMeans and d-PAC and  
728 SPADE are 1.21 and 1.45, respectively; and the overall difference between b-PAC and flowMeans and b-  
729 PAC and SPADE are 2.06 and 2.31, respectively. The difference table is provided in Supporting Table 1.

730

### 731 **Supporting Figure 3: Gene Networks inferred from subpopulations in the dynamic example** 732 **simulated dataset**

733 Figure 3 introduced the dynamic example in which five samples each having 2 true subpopulations  
734 capture the almost-convergence of means. Here the underlying gene network structures for the PAC  
735 discovered subpopulations (three per sample) are presented.

736

### 737 **Supporting Figure 4: Comparison between aligning cross-sample subpopulations by gene network,** 738 **expression profile, or both**

739 (a) PAC can be used to discover more subpopulations, with the effect of more partitions from the true  
740 clusters. (b) When over-partitioning is present, gene network or gene expression profile alone cannot  
741 resolve the dynamic (or batch) effects due to noisy covariance for small fragments of distributions.  
742 However, first aligning the larger subpopulations with more stable covariance, and thus network  
743 structures, and then merge in the smaller subpopulations by expression profile resolves the effects. (c) If  
744 more irrelevant edges were introduced, network alignment would fail due to the negative impact of the  
745 miscellaneous edges; however, eliminating small subpopulations from the alignment step alleviates the  
746 increased edge count problem.

747

### 748 **Supporting Figure 5: PAC-MAN style linkage by means**

749 (a) t-sne plots of mouse tissue samples colored by representative subpopulations labels from linkage by  
750 means. (b) Subpopulation proportion heatmap of clades of samples from linkage by means.

751

## 752 **Supporting Figure 6: Comparison between network and means PAC-MAN**

753 (a) PAC-discovered subpopulations are aggregated by MAN into clades; the number of PAC  
754 subpopulations/clades for the network and means PAC-MAN approaches are plotted. (b) After  
755 aggregating shared clades within samples, the number of shared clades for the entire dataset is plotted for  
756 the two PAC-MAN approaches. c) Using the network approach results as basis, the clades with strong  
757 agreement (high p-measures) with the means PAC-MAN approach are given. The shared clades (present  
758 in more than one sample) are reliable candidates for future experiment to find cross-sample relationships.

759

## 760 **Table 1: F-measure Comparisons of Methods on Simulated and Hand-gated Cytometry Datasets.**

761 F-measure is calculated using the original hand-gate labels and the estimated labels generated by each  
762 analysis method. The true-positives are found if the methods assign the same labels to points belonging to  
763 the same subpopulation in the hand-gated data. The more true-positives found, the higher the F-measure,  
764 which ranges from 0 to 1, with 1 being the highest. Partition-based methods perform consistently well on  
765 data ranging from 5 to 39 dimensions. In the simulations, d-PAC and b-PAC perform just as well or better  
766 than flowMeans and SPADE. flowMeans gives drastically different F-measures for the cases  
767 20\_10\_40\_100k and 20\_20\_40\_100k : 0.25386 vs. 0.92518; this large difference is likely due to the  
768 random initiation of cluster centers. In the hand-gated datasets, SPADE has the worst performance.  
769 Ultimately, the performance of flowMeans and SPADE deteriorate for the 39-dimensional real CyTOF  
770 data, while d-PAC and b-PAC perform consistently well.

771 \*Simulated data have the following convention: a\_b\_c\_d, where a denotes the number of  
772 dimensions/markers, b denotes the number of subpopulations, c denotes the size of the hypercube for data  
773 generation, and d denotes the number of cells.

774 \*\*from rounding up, not originally 1.00

775

## 776 **Supporting Table 1: Purity (p) Measure Differences in CyTOF Comparison**

777 p-measure differences in gated CyTOF data analysis comparison. The differences are shown for all the  
778 annotated cell subpopulations, which are ordered by their sizes. Overall, the PAC methods give more  
779 positive p-measures.

780

## 781 **Supporting Table 2: Sample Sizes in Mouse Tissue CyTOF Dataset**

782 The numbers of cells in the samples of Spitzer et al., 2015 CyTOF dataset. The data is from the C57BL6  
783 mouse strain and a total of ten tissue samples are present. The raw column shows the number of cells

784 prior to filtering by DNA and cisplatin values. The final cell counts are shown in the filtered file (3<sup>rd</sup>)  
785 column.

786

787 **Supporting Table 3: PAC-MAN Subpopulation Characterization Output for Mouse Tissue CyTOF**  
788 **Dataset**

789 The full set of annotated results, along with mean expressions, subpopulation proportion and counts, are  
790 reported.

791

792 **Supporting Table 4: Network-justified and means-justified p-measures for Alignments of PAC-**  
793 **discovered Subpopulations**

794 The PAC-discovered subpopulations were mapped as clades in both the network and means PAC-MAN  
795 approaches. The p-measures were calculated for the cases 1) network approach mapping as the basis and  
796 2) means approach mapping as the basis. The comparison is the same in principle to the comparison of  
797 labels for clustering methods. The results are ordered by p-measures.

798

# Figure 1

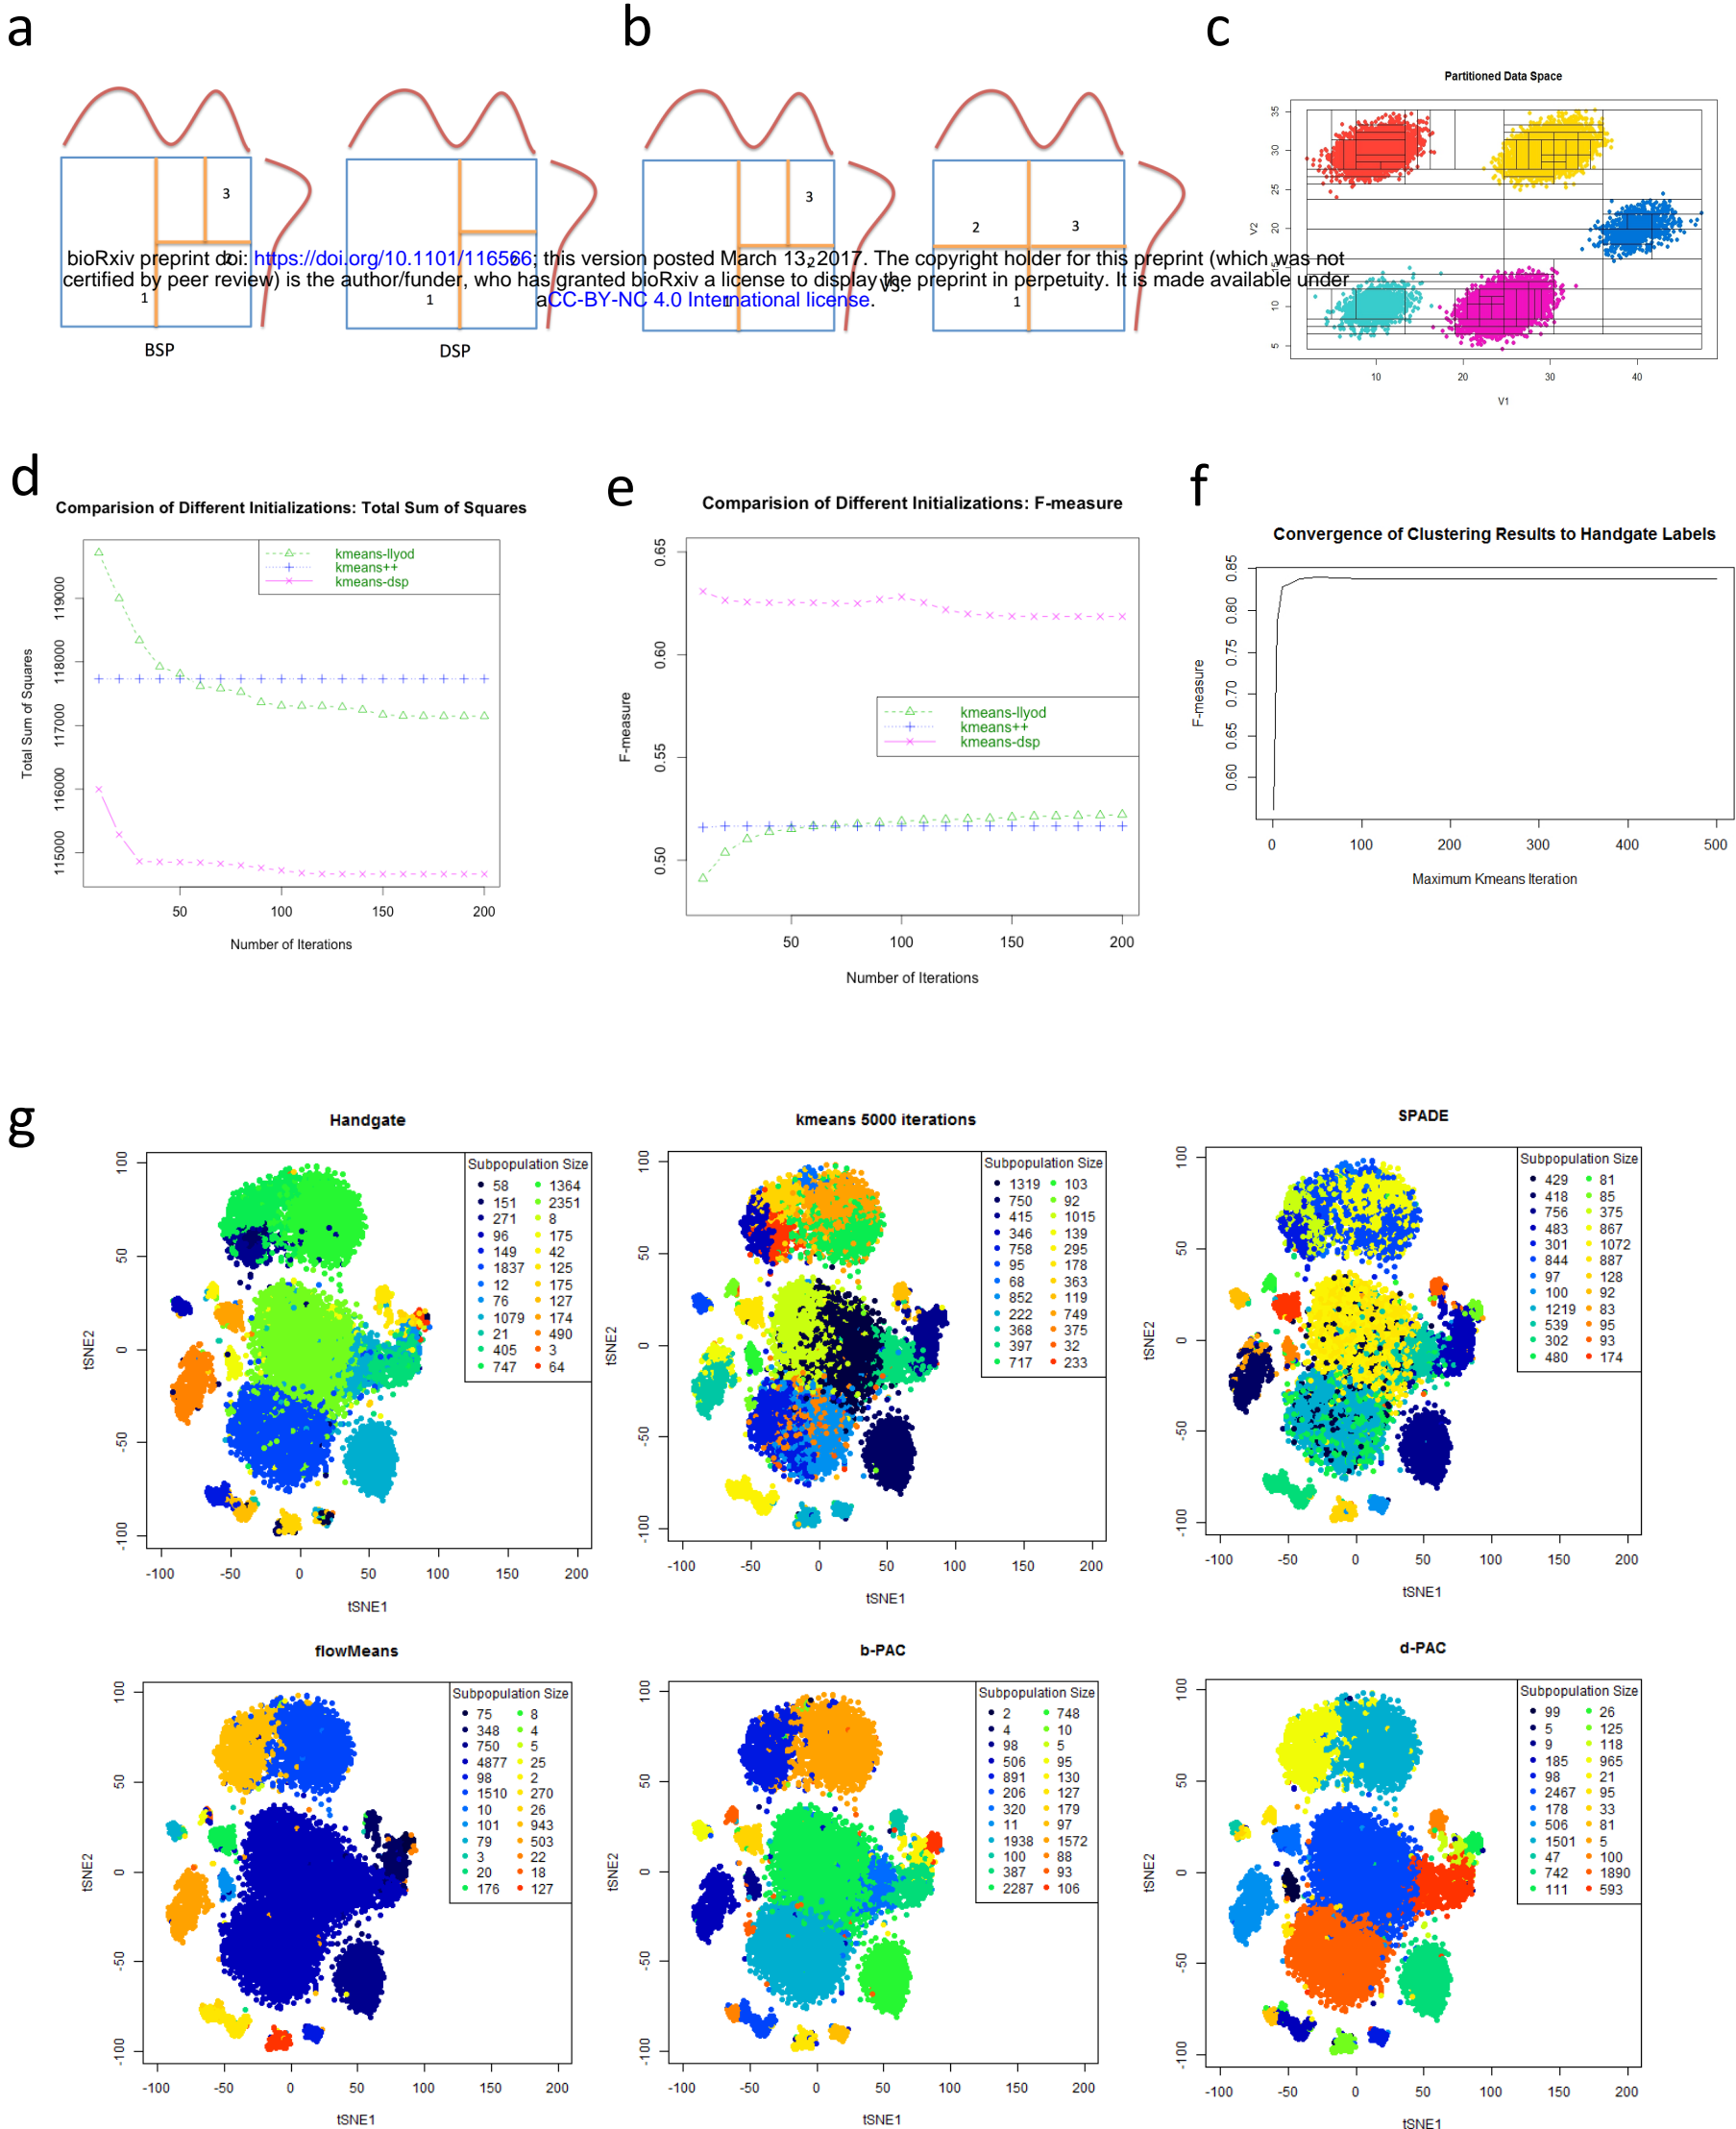

# Figure 2

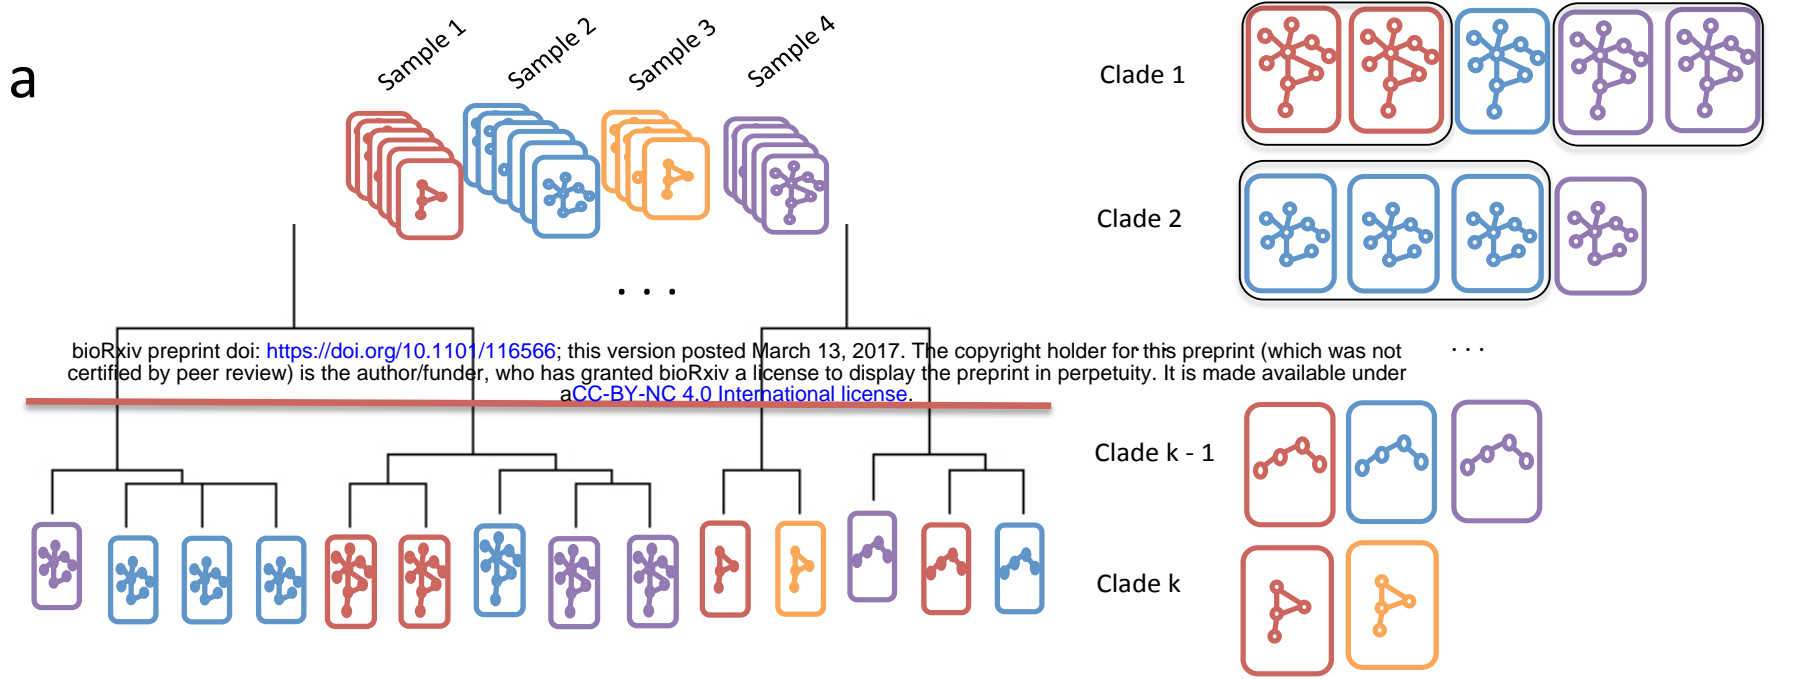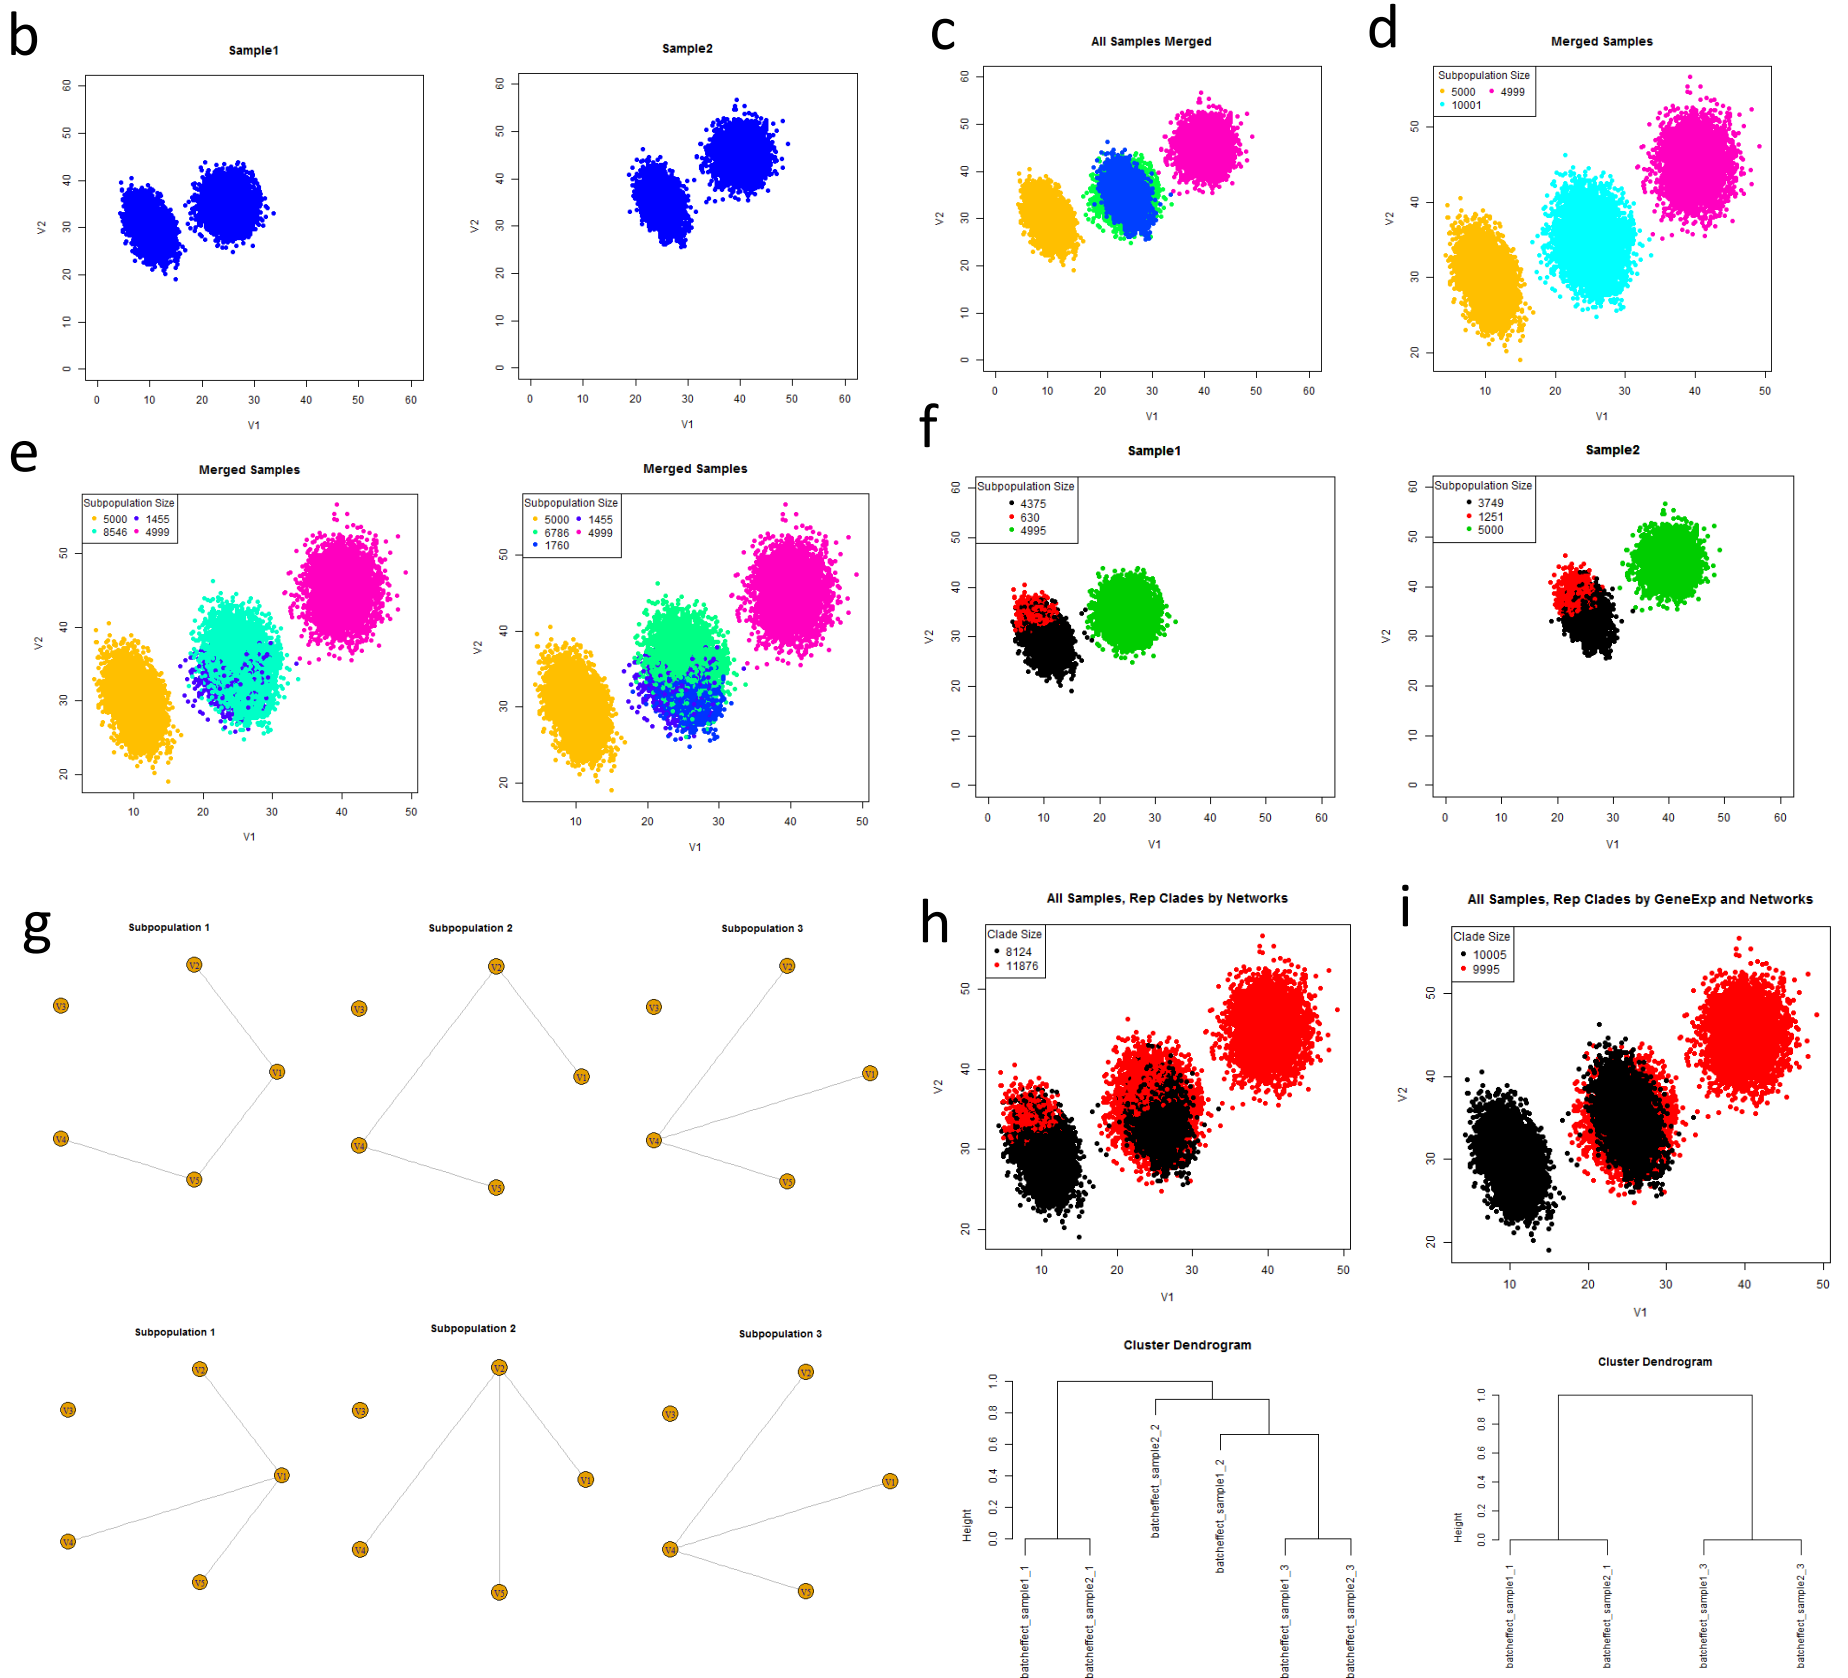

# Figure 3

a

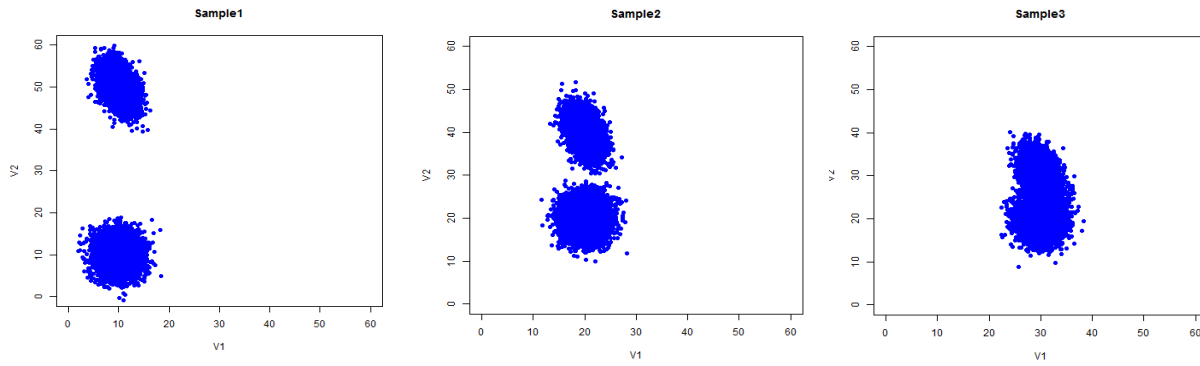

bioRxiv preprint doi: <https://doi.org/10.1101/116566>; this version posted March 13, 2017. The copyright holder for this preprint (which was not certified by peer review) is the author/funder, who has granted bioRxiv a license to display the preprint in perpetuity. It is made available under aCC-BY-NC 4.0 International license.

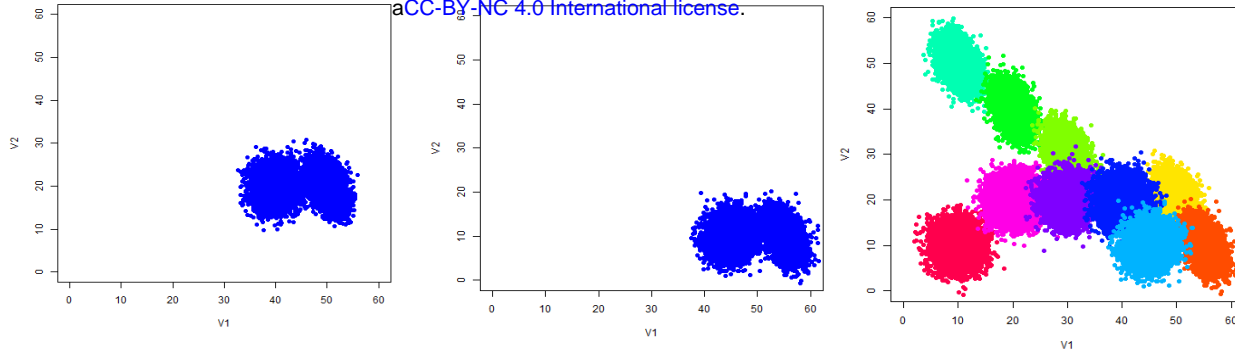

b

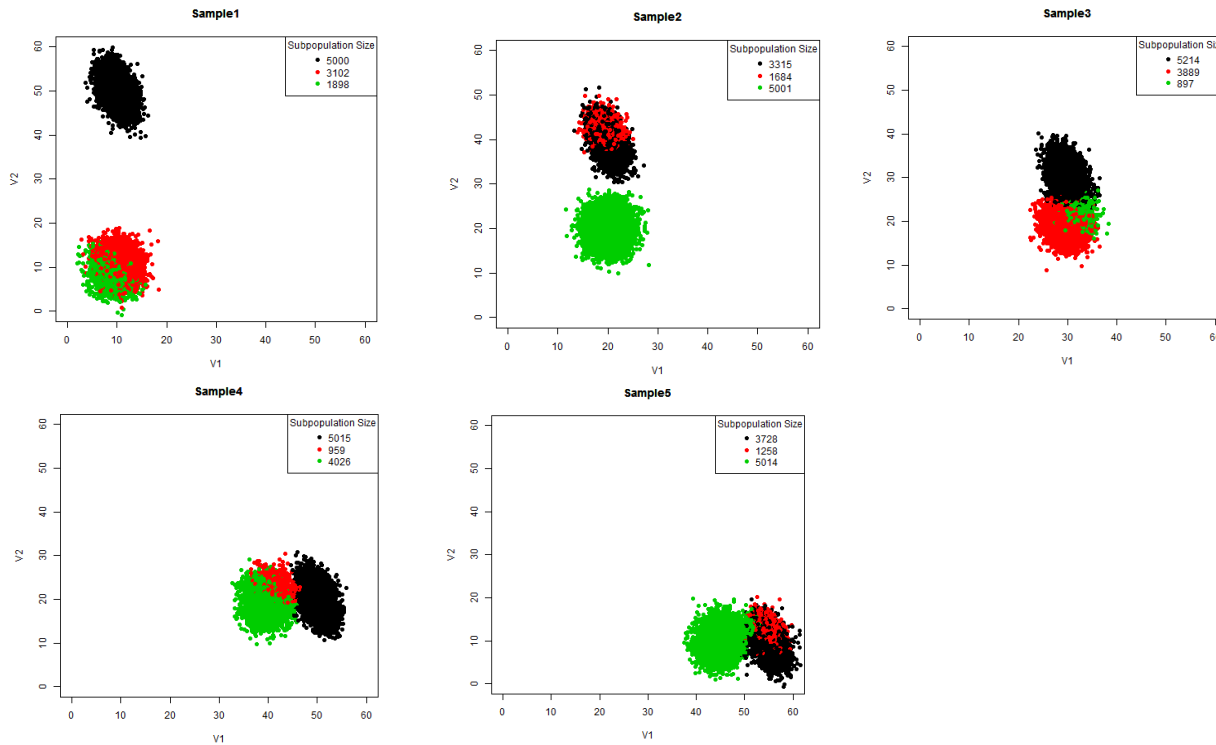

c

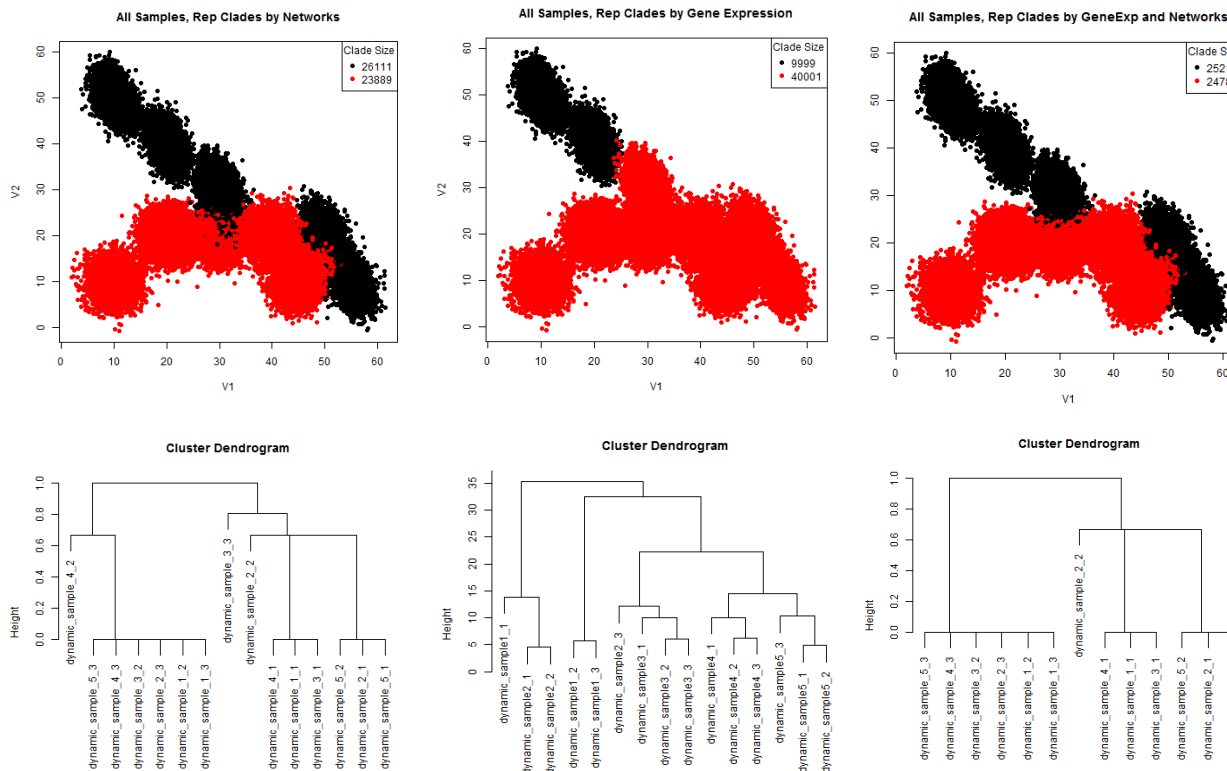



# Figure 4

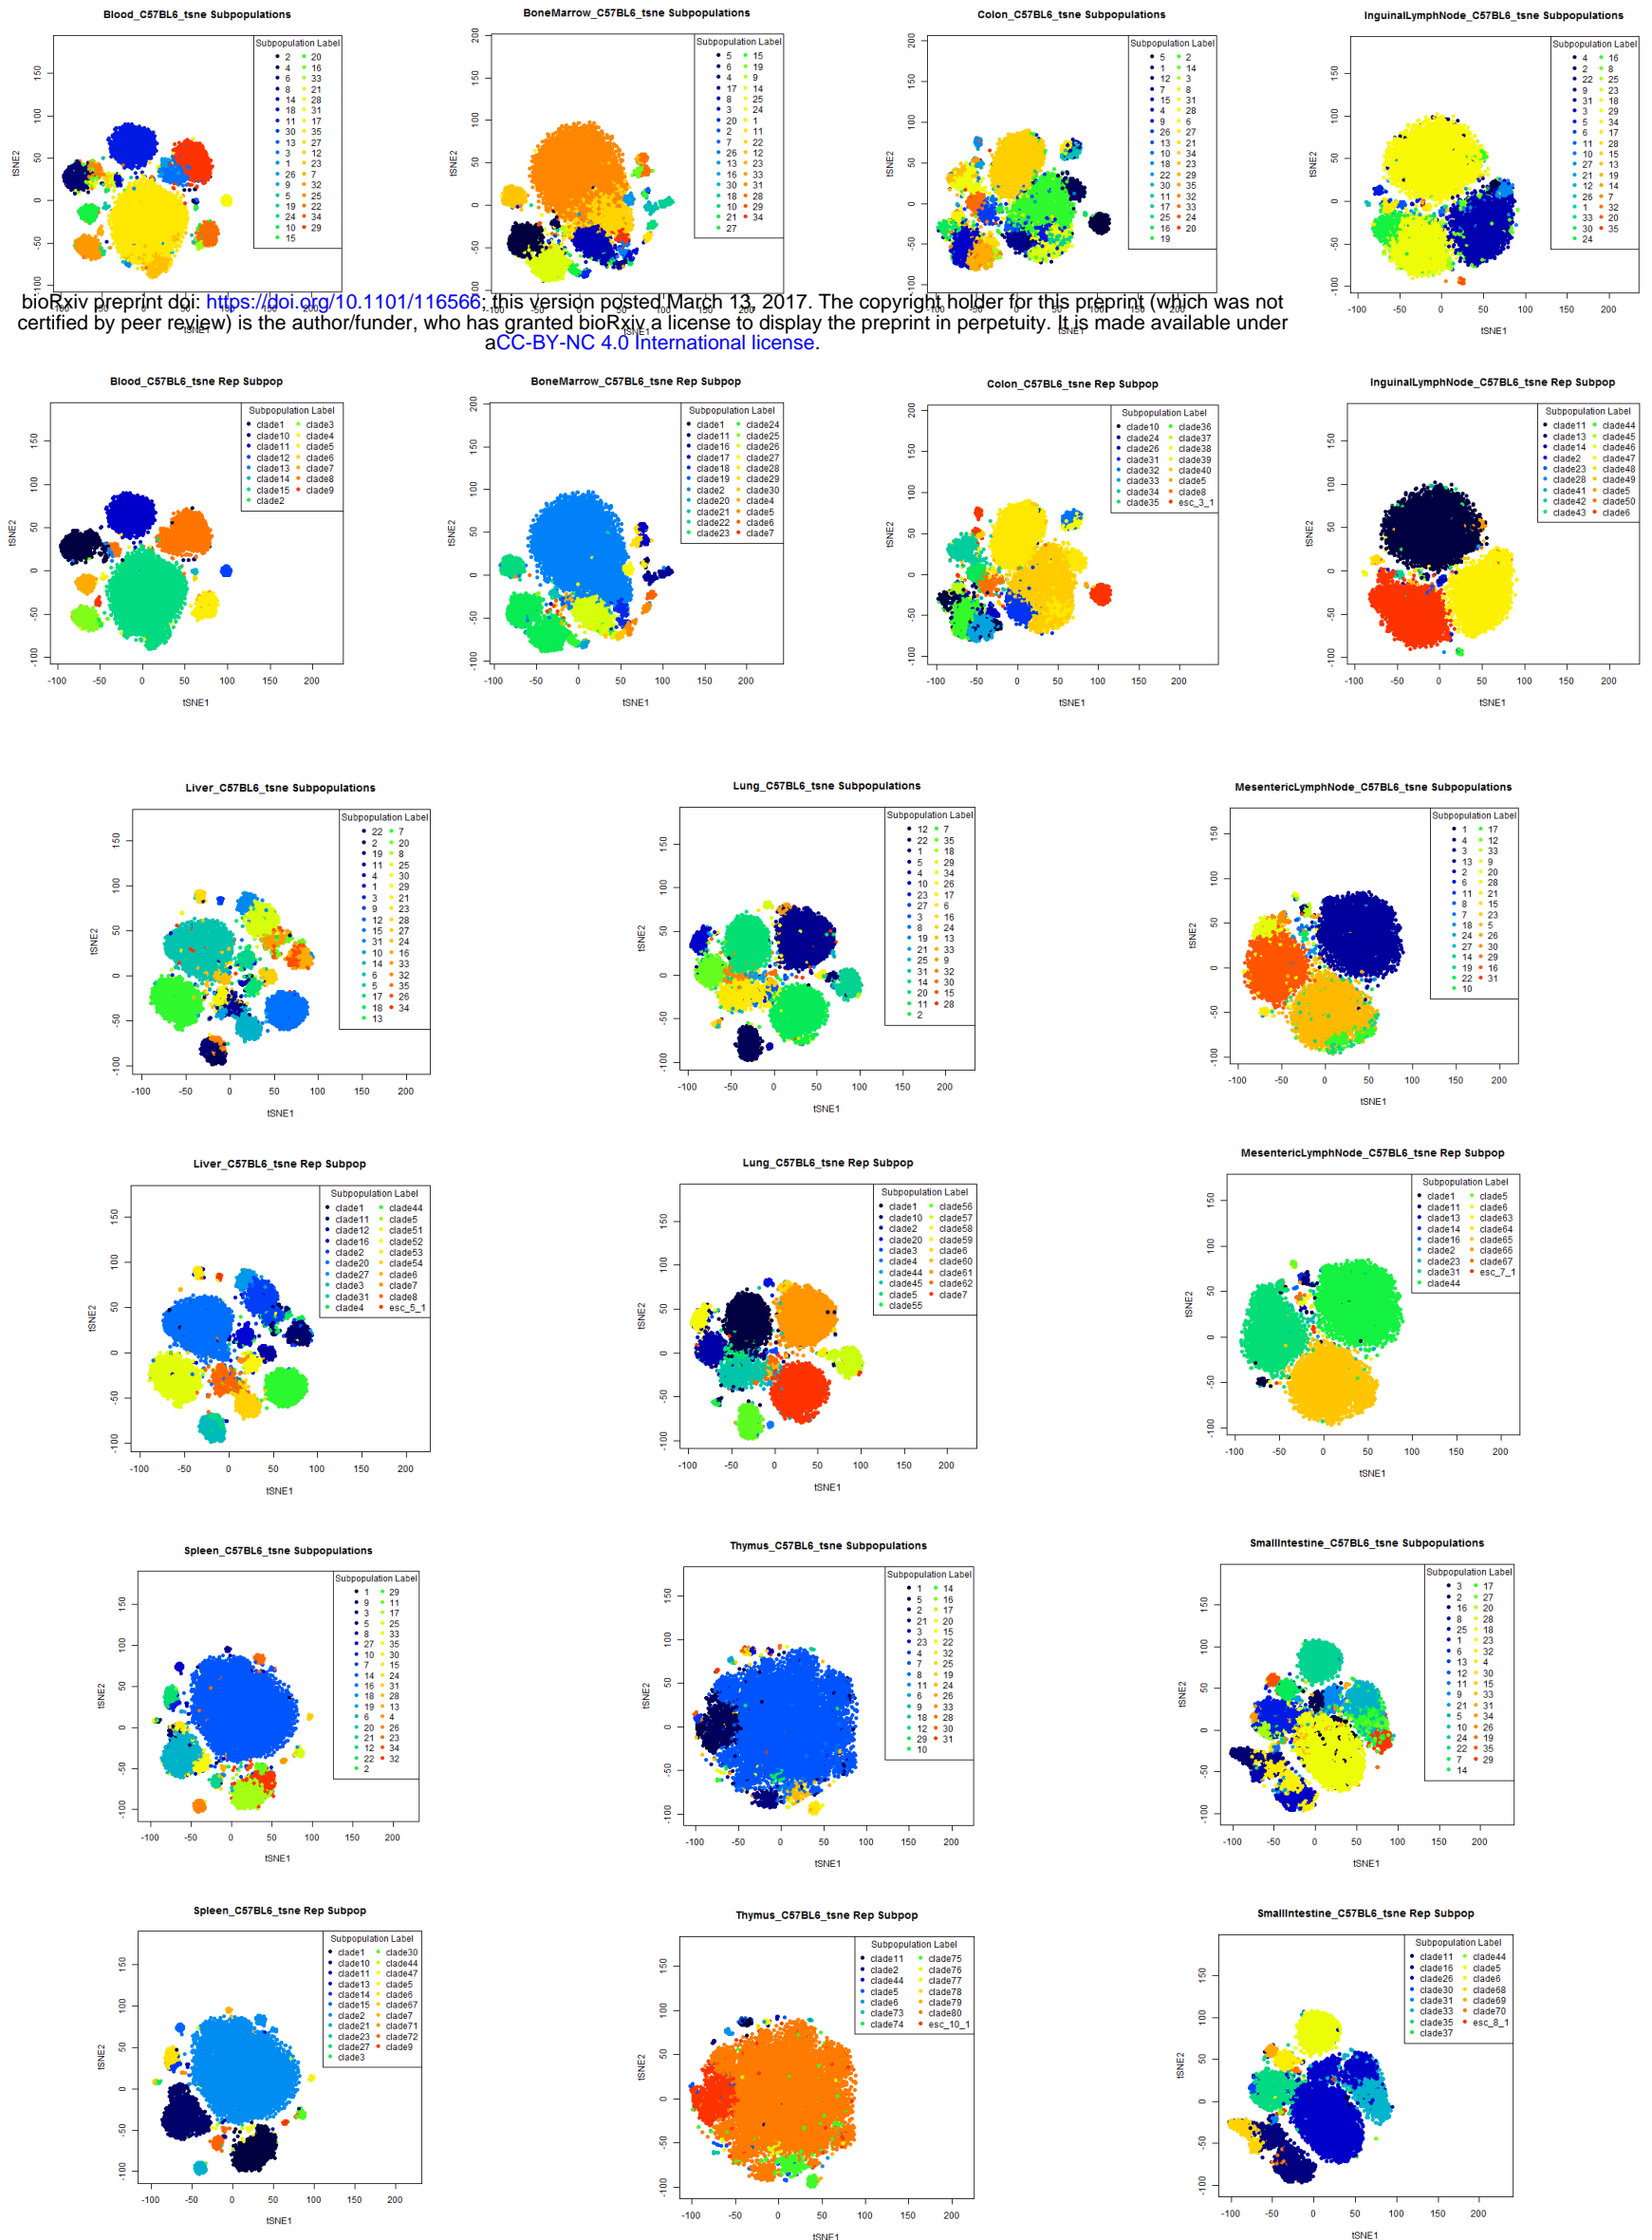

bioRxiv preprint doi: <https://doi.org/10.1101/116566>; this version posted March 13, 2017. The copyright holder for this preprint (which was not certified by peer review) is the author/funder, who has granted bioRxiv a license to display the preprint in perpetuity. It is made available under aCC-BY-NC 4.0 International license.

Figure 5

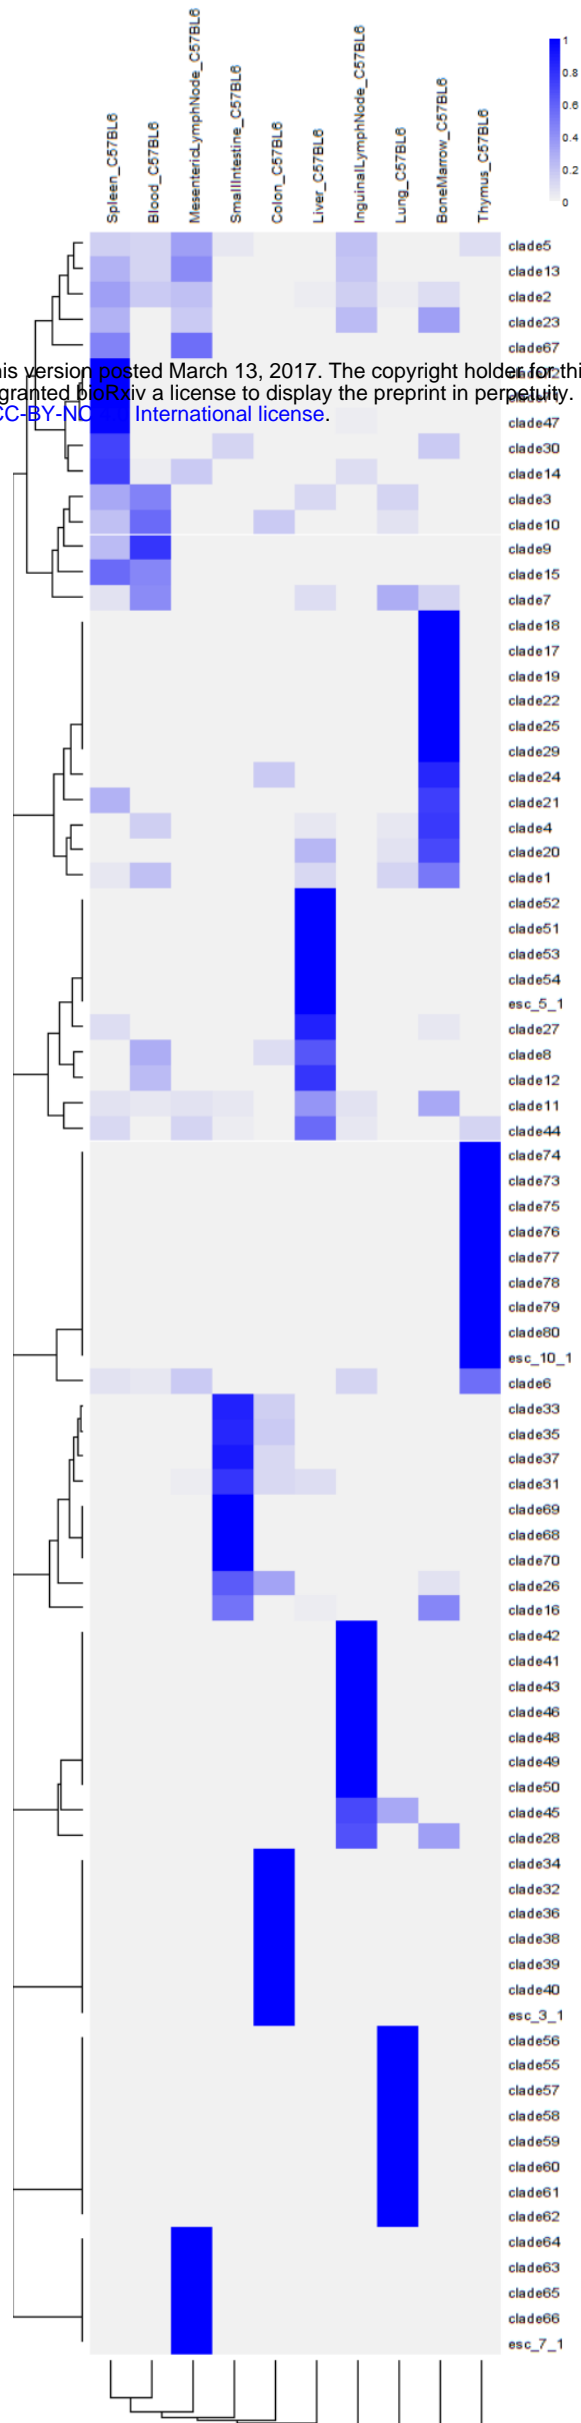

bioRxiv preprint doi: <https://doi.org/10.1101/116566>; this version posted March 13, 2017. The copyright holder for this preprint (which was not certified by peer review) is the author/funder, who has granted bioRxiv a license to display the preprint in perpetuity. It is made available under aCC-BY-NC 4.0 International license.

# Supporting Figure 1

bioRxiv preprint doi: <https://doi.org/10.1101/116566>; this version posted March 13, 2017. The copyright holder for this preprint (which was not certified by peer review) is the author/funder, who has granted bioRxiv a license to display the preprint in perpetuity. It is made available under aCC-BY-NC 4.0 International license.

Pre-gating

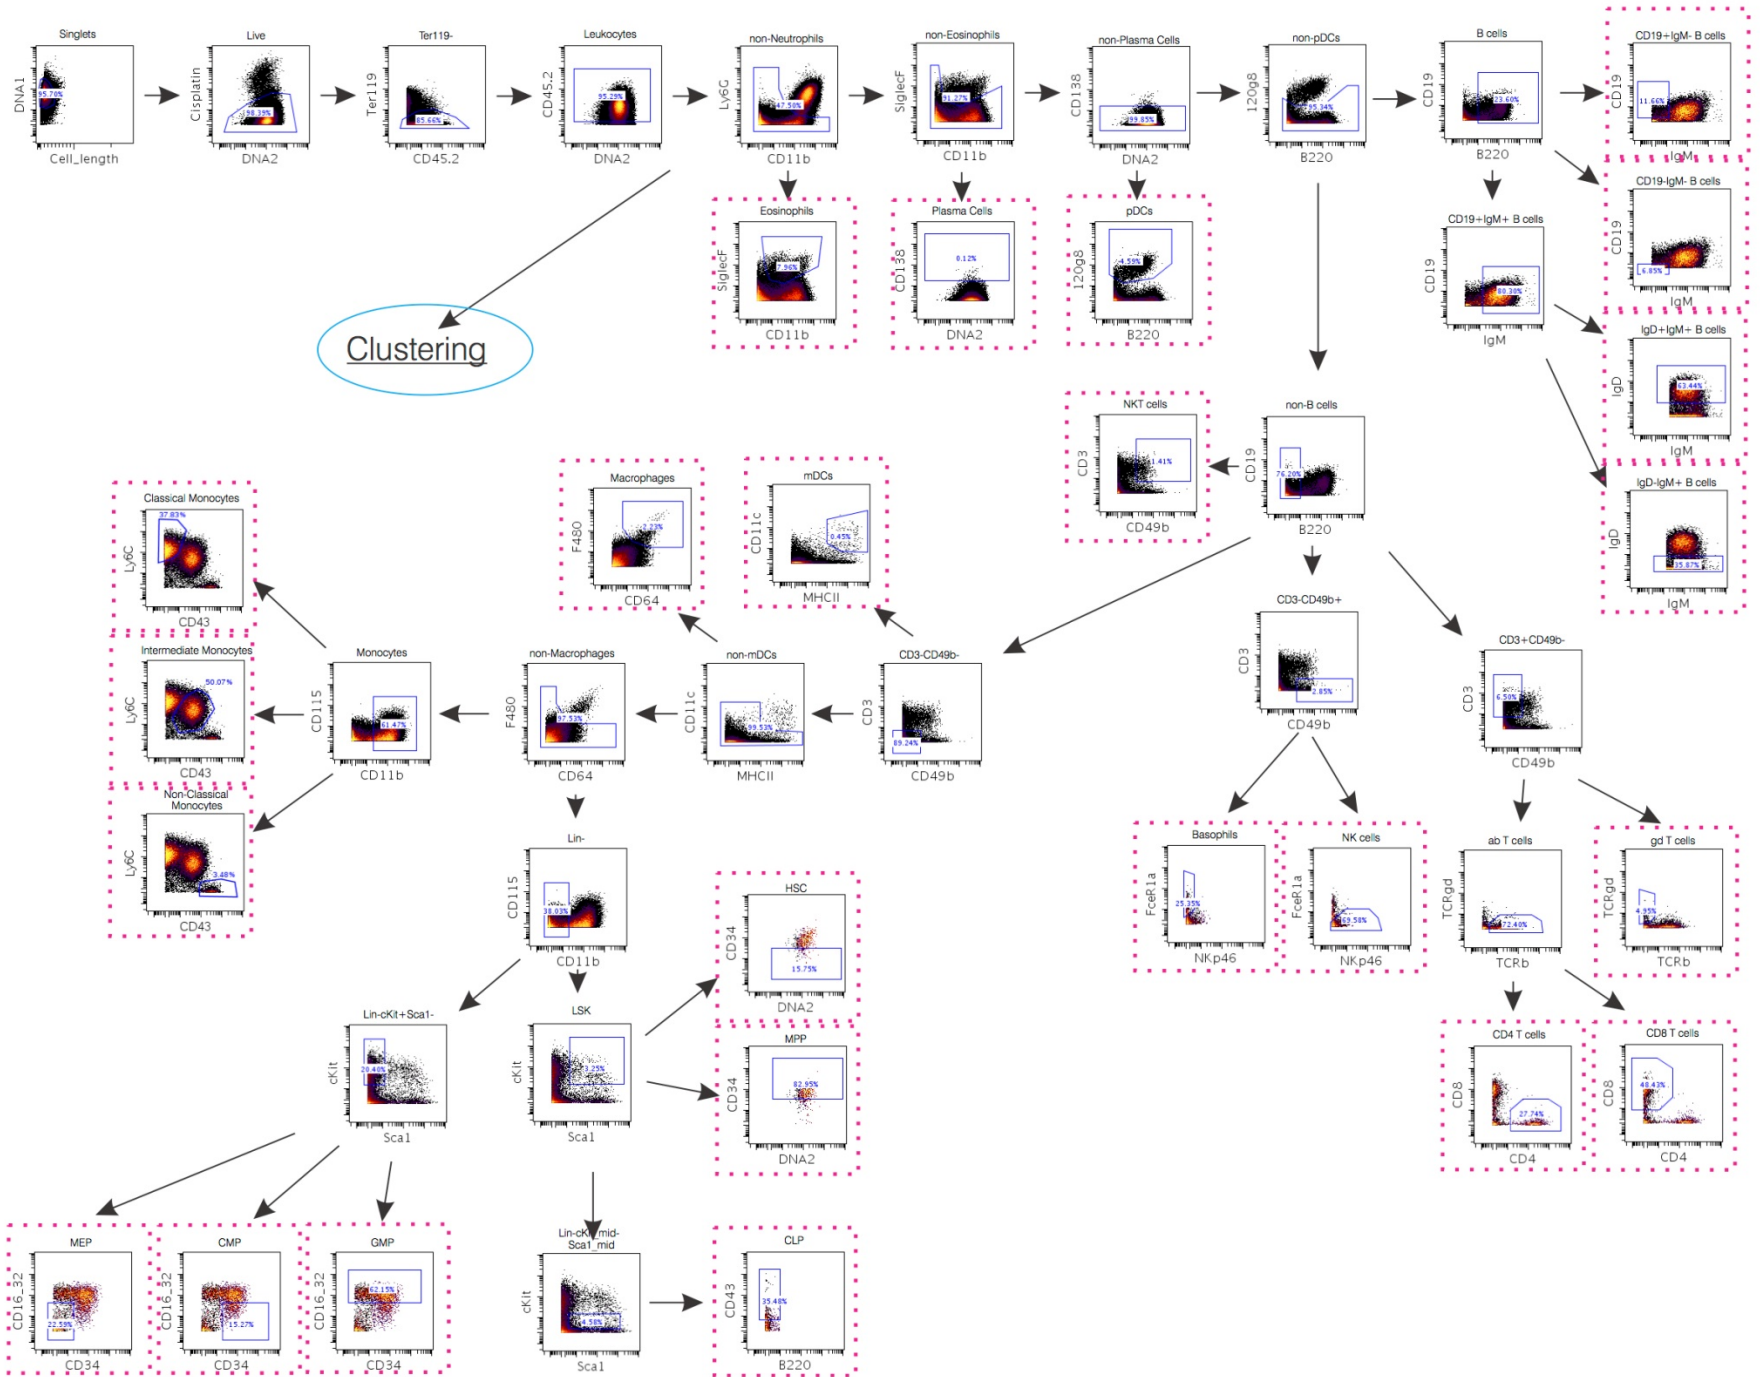

# Supporting Figure 2

a

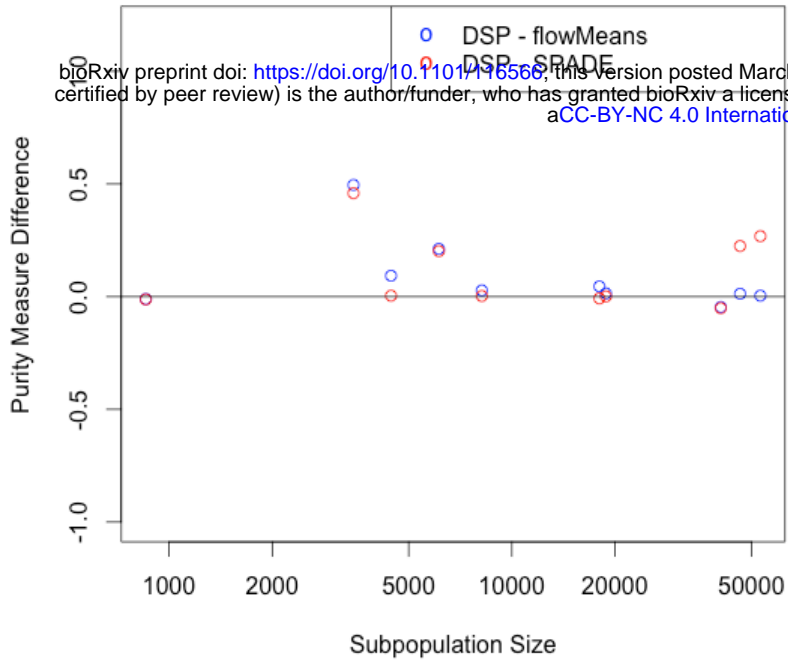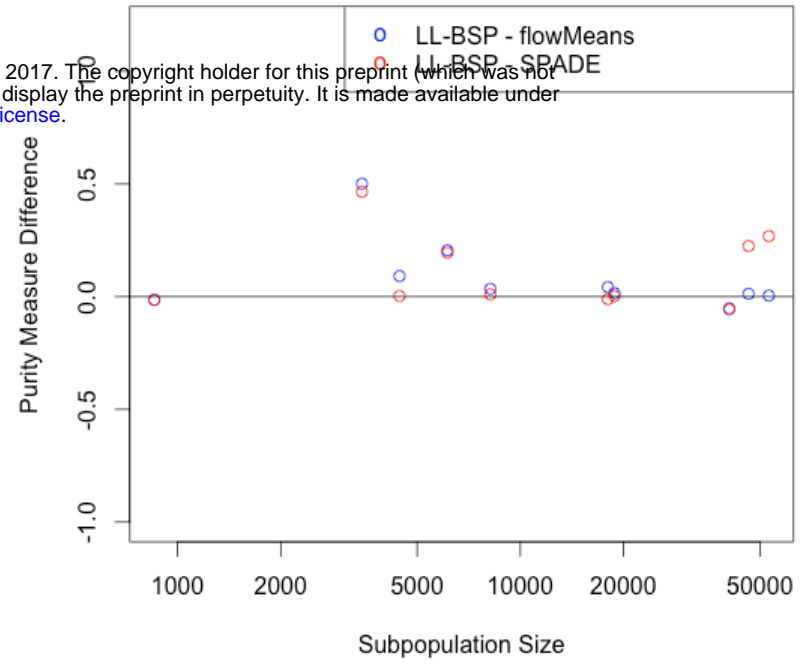

b

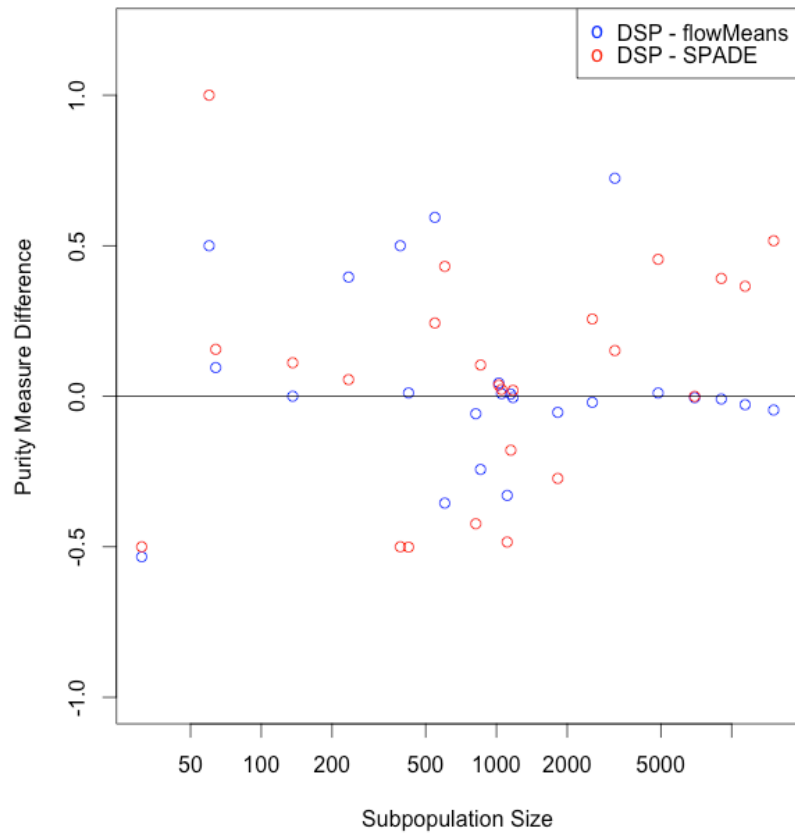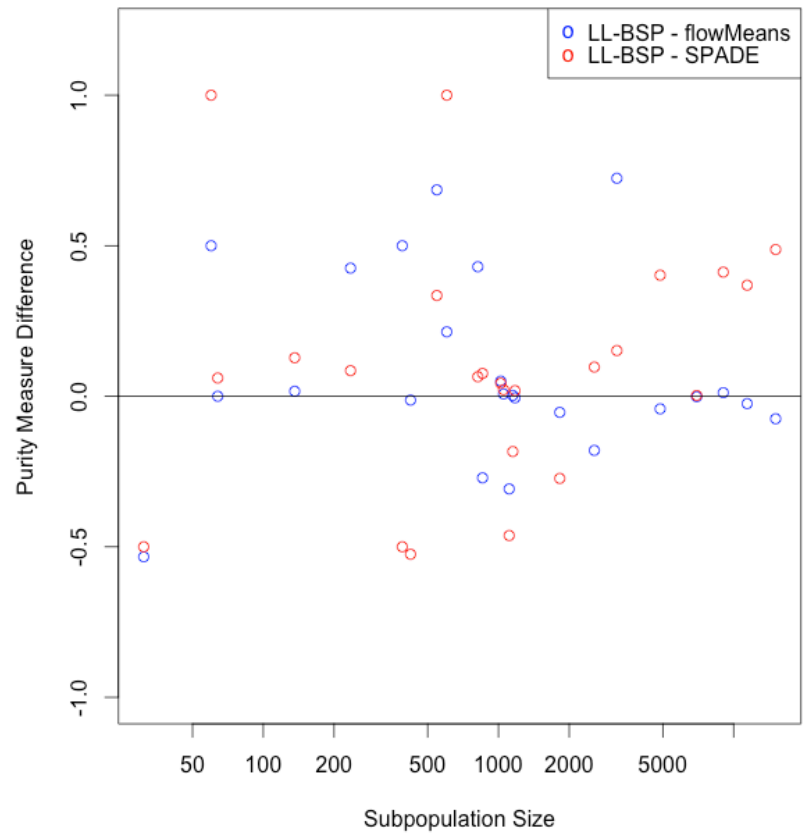

# Supporting Figure 3

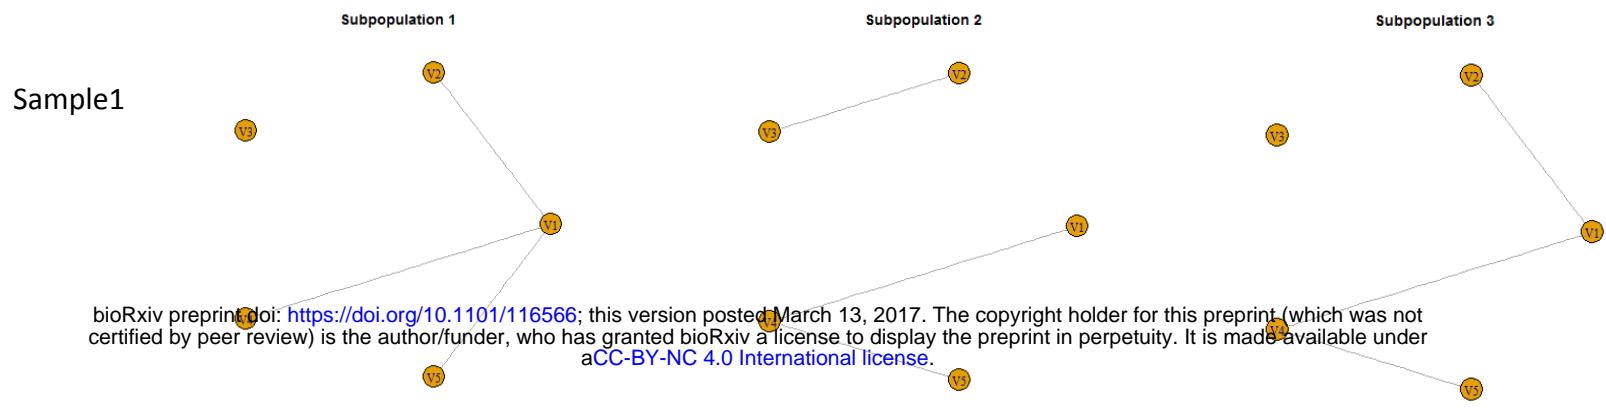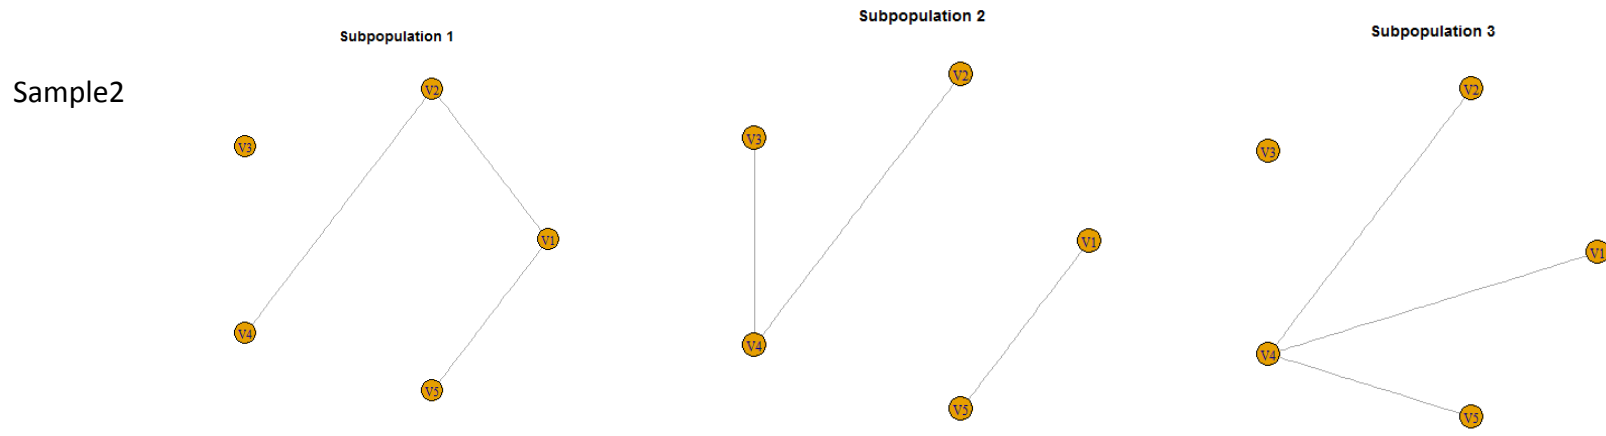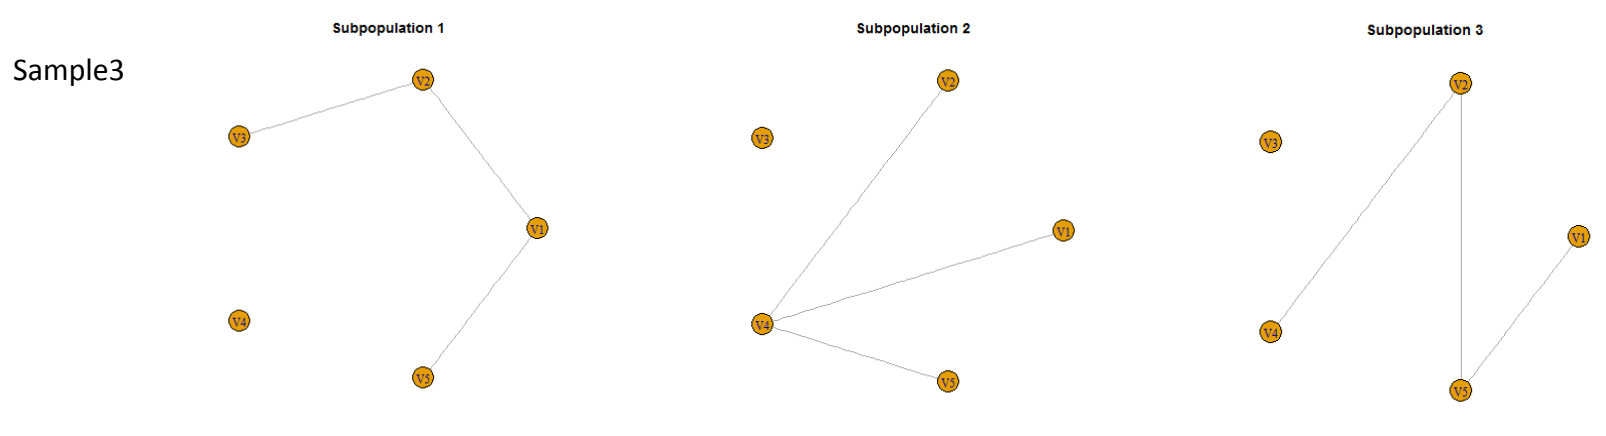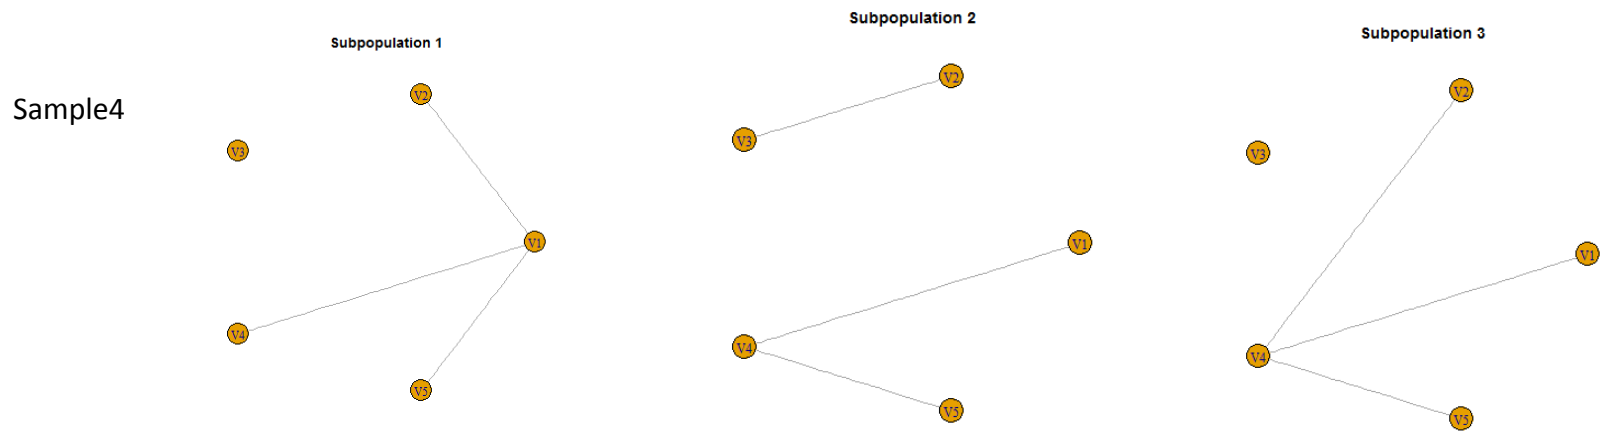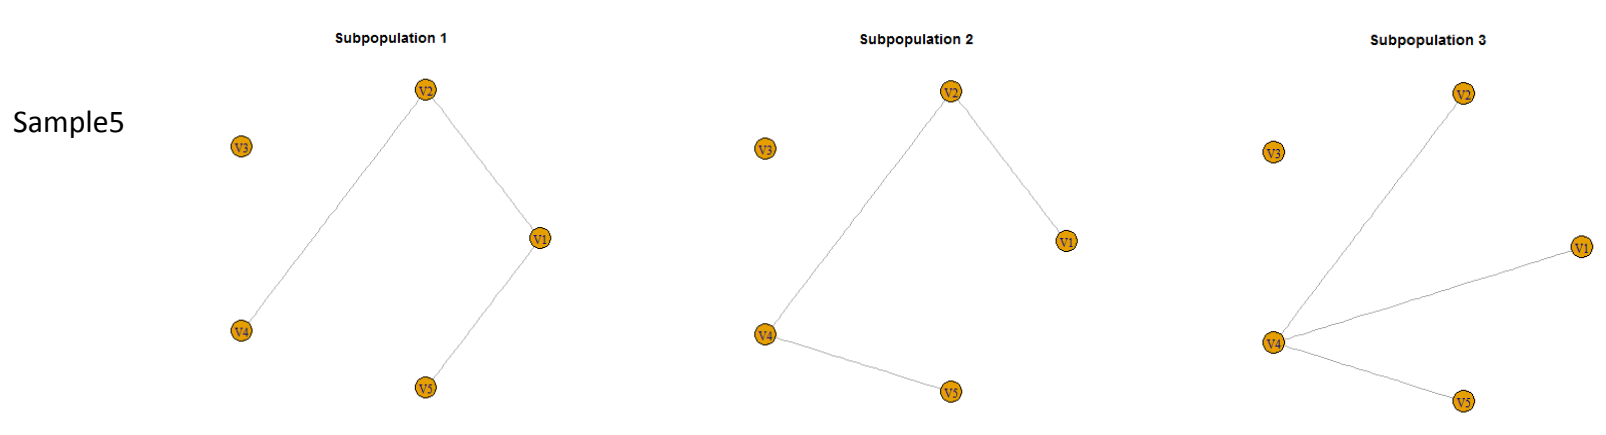

# Supporting Figure 4

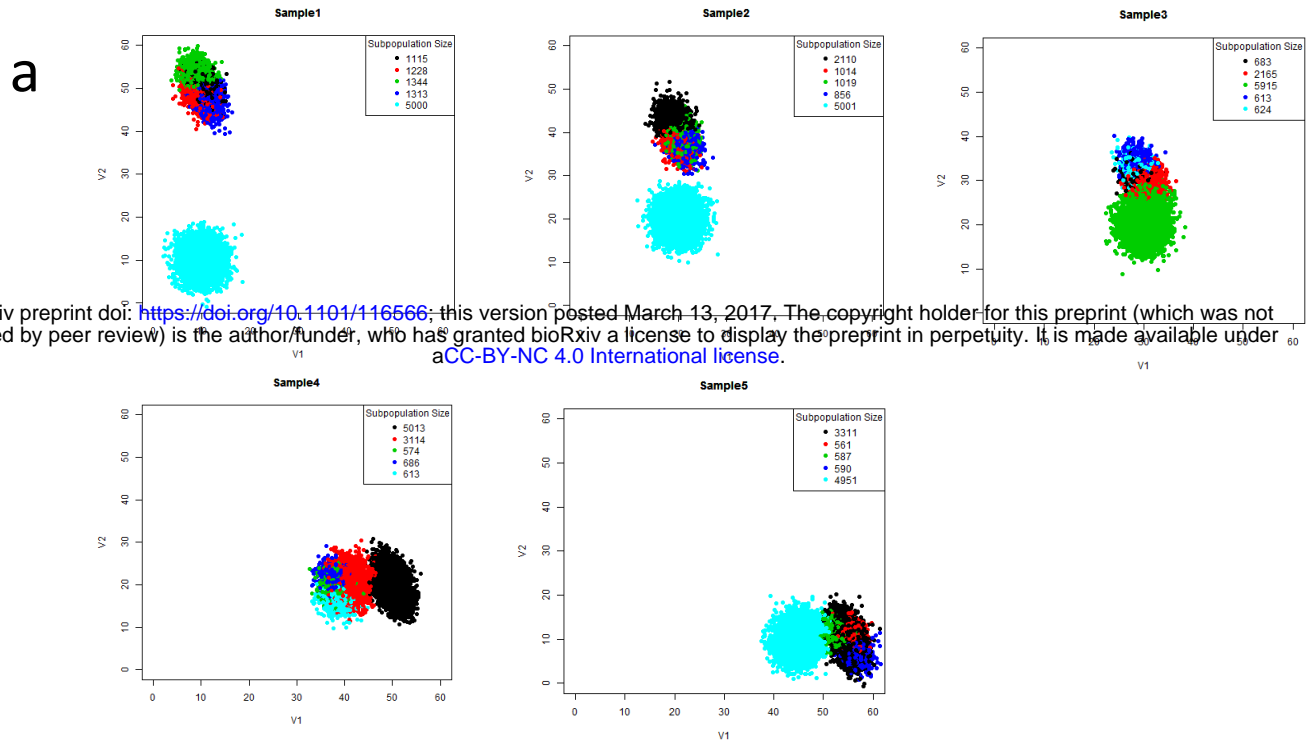

bioRxiv preprint doi: <https://doi.org/10.1101/116566>; this version posted March 13, 2017. The copyright holder for this preprint (which was not certified by peer review) is the author/funder, who has granted bioRxiv a license to display the preprint in perpetuity. It is made available under aCC-BY-NC 4.0 International license.

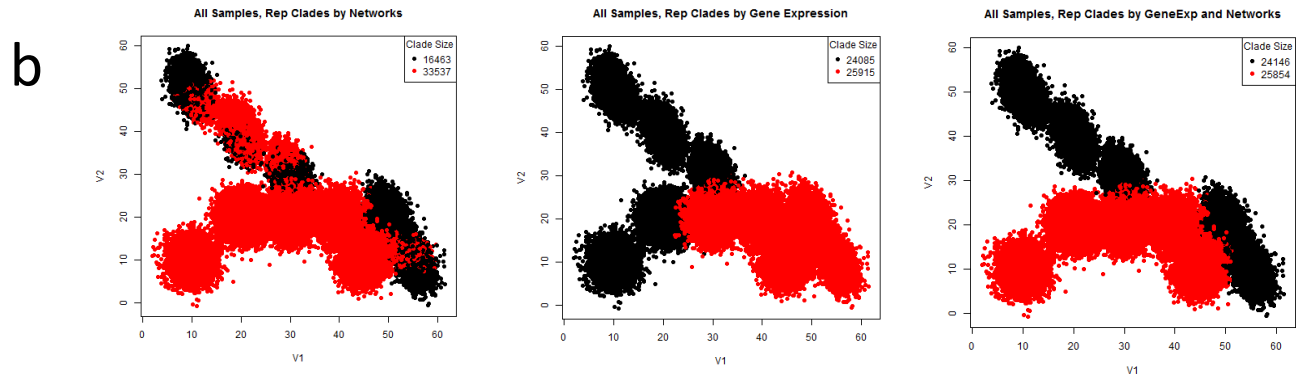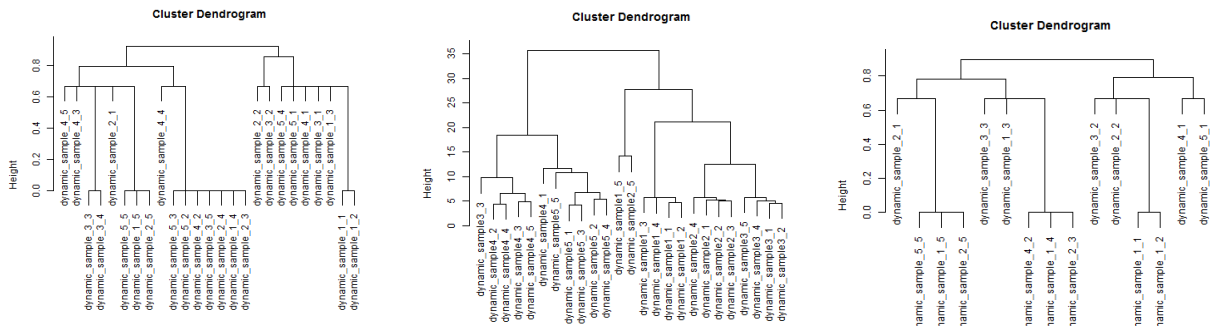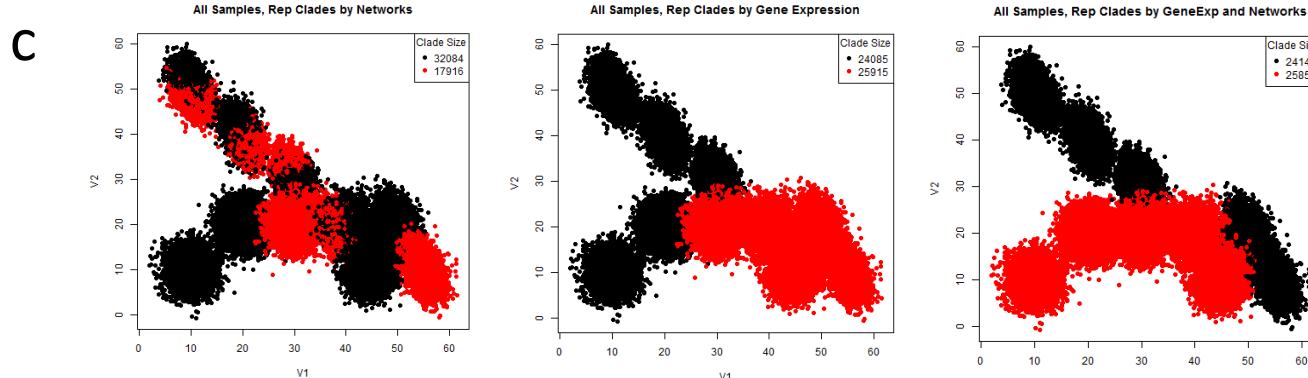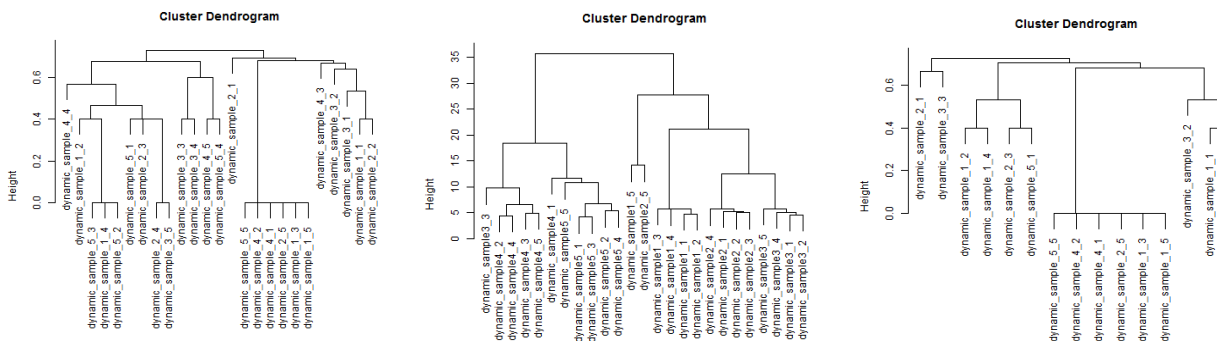



# Supporting Figure 5

a

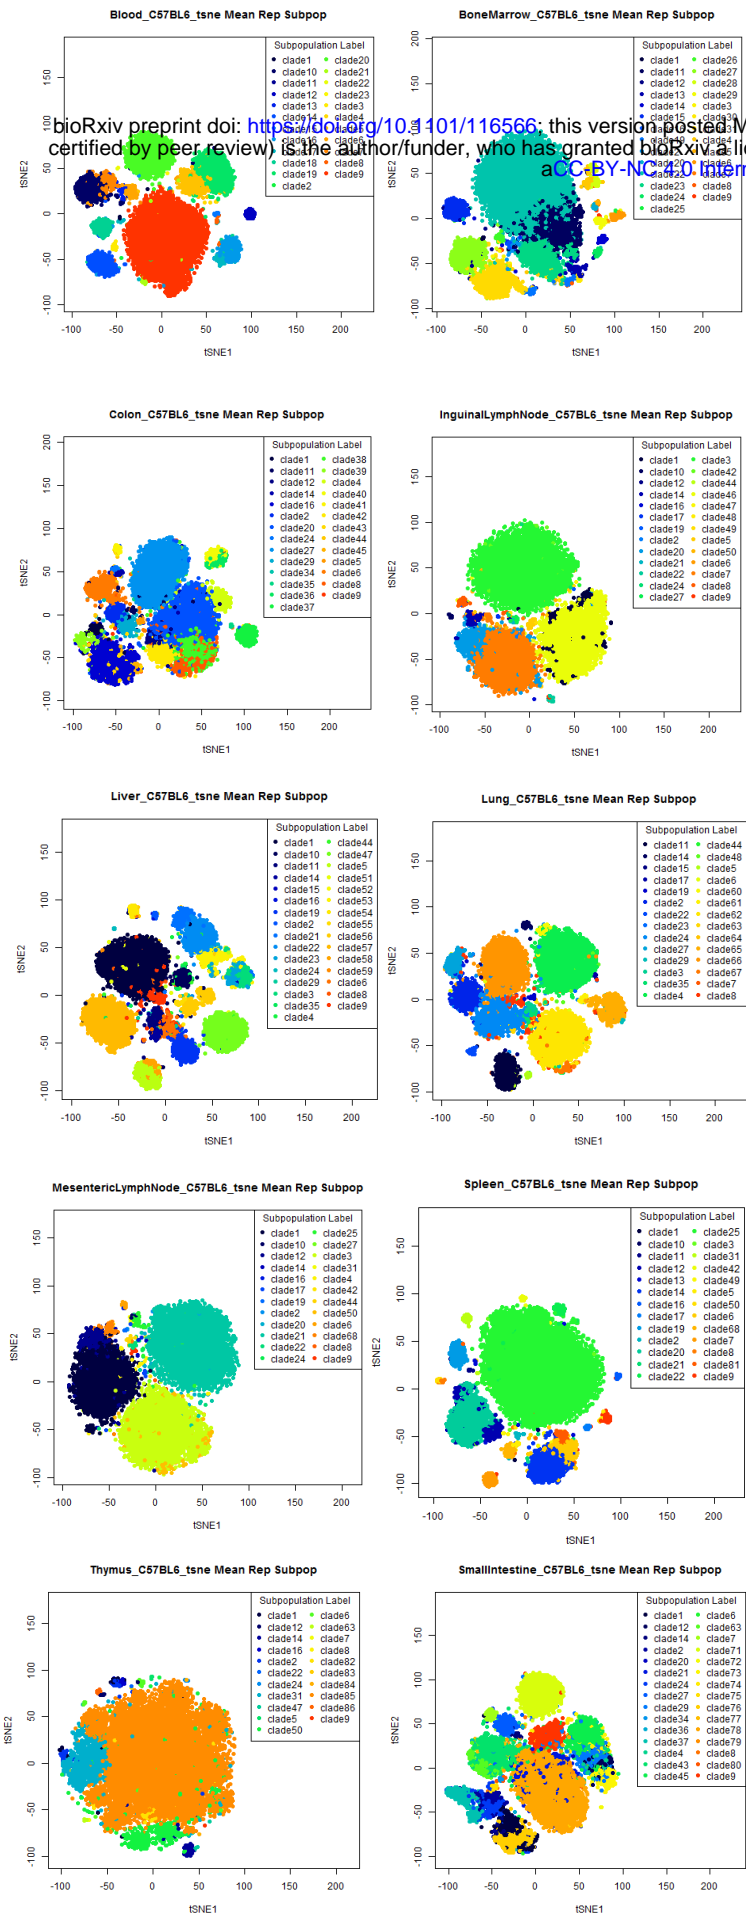

b

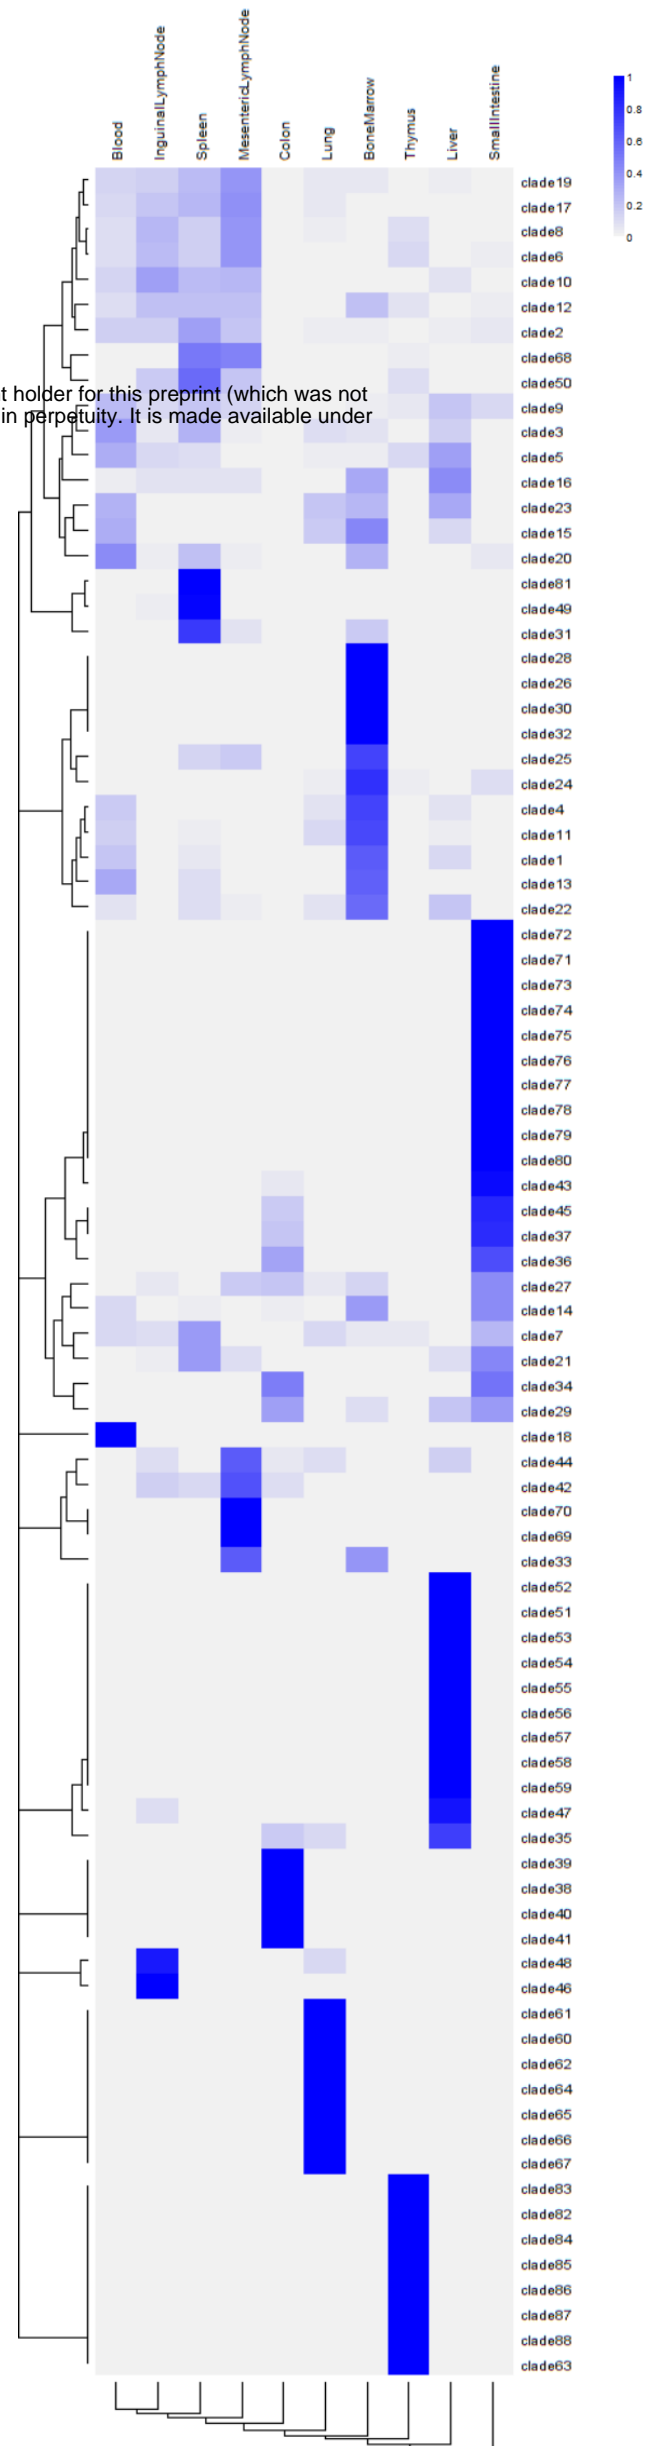

# Supporting Figure 6

a

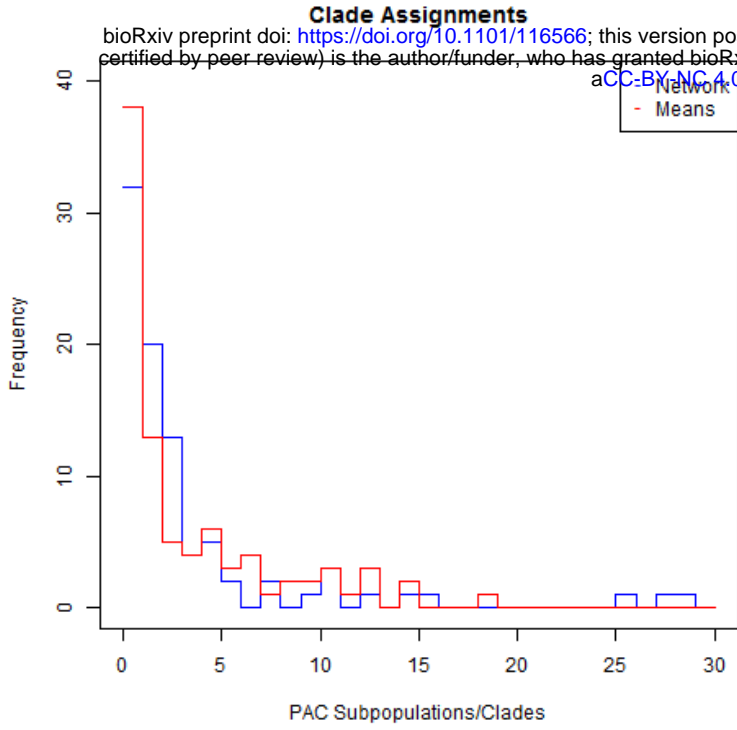

b

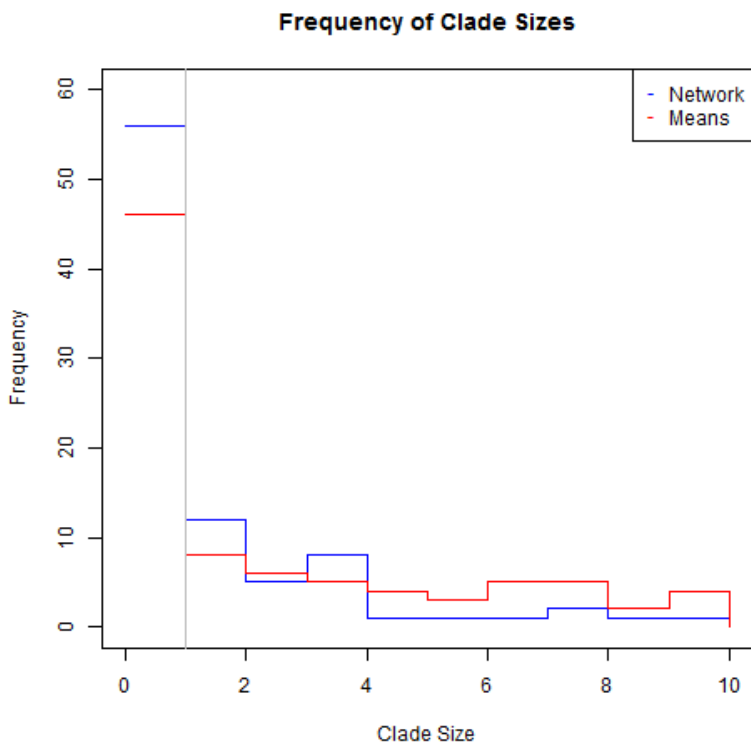

c

| Clade    | Number of PAC Subpop | n-measure | Dataset-level Proportion | Number of Samples Present |
|----------|----------------------|-----------|--------------------------|---------------------------|
| clade1   | 1                    | 1         | 0.826687342              | 4                         |
| clade4   | 1                    | 1         | 0.076407462              | 5                         |
| clade9   | 2                    | 1         | 0.031185486              | 2                         |
| clade15  | 2                    | 1         | 1.283666519              | 2                         |
| clade16  | 5                    | 1         | 0.277964818              | 4                         |
| clade19  | 2                    | 1         | 0.063776132              | 1                         |
| clade22  | 1                    | 1         | 0.000339958              | 1                         |
| esc_2_1  | 1                    | 1         | 0.000377731              | 1                         |
| esc_2_2  | 1                    | 1         | 0.010417826              | 1                         |
| clade32  | 1                    | 1         | 0.216689266              | 1                         |
| clade33  | 3                    | 1         | 0.065861208              | 2                         |
| clade34  | 1                    | 1         | 0.027634813              | 1                         |
| clade39  | 3                    | 1         | 0.001442933              | 1                         |
| esc_3_1  | 1                    | 1         | 0.007660388              | 1                         |
| clade40  | 1                    | 1         | 0.034947688              | 1                         |
| clade43  | 3                    | 1         | 0.043590178              | 2                         |
| clade45  | 2                    | 1         | 0.023426888              | 1                         |
| clade46  | 3                    | 1         | 0.291140081              | 2                         |
| clade47  | 2                    | 1         | 0.004026614              | 1                         |
| esc_5_1  | 1                    | 1         | 0.043907472              | 1                         |
| clade57  | 1                    | 1         | 0.015026146              | 1                         |
| clade60  | 1                    | 1         | 0.000695025              | 1                         |
| esc_8_1  | 1                    | 1         | 0.614742379              | 1                         |
| clade73  | 3                    | 1         | 0.090496835              | 1                         |
| clade74  | 1                    | 1         | 0.008151439              | 1                         |
| clade76  | 1                    | 1         | 0.002266387              | 1                         |
| esc_10_1 | 2                    | 1         | 0.013688978              | 1                         |
| clade80  | 1                    | 1         | 0.084717548              | 3                         |
| clade30  | 4                    | 0.75      | 0.645202621              | 8                         |
| clade11  | 15                   | 0.73333   | 0.117451732              | 3                         |
| clade8   | 3                    | 0.66667   | 0.065249283              | 2                         |
| clade28  | 3                    | 0.66667   | 0.052648171              | 1                         |
| clade38  | 3                    | 0.66667   | 0.038407706              | 2                         |
| clade67  | 3                    | 0.66667   | 2.813553327              | 6                         |
| clade1   | 10                   | 0.5       | 0.297402864              | 4                         |
| clade10  | 8                    | 0.5       | 0.138785989              | 4                         |
| clade13  | 8                    | 0.5       | 0.110365495              | 1                         |
| clade17  | 2                    | 0.5       | 0.276642759              | 1                         |
| clade18  | 3                    | 0.5       | 0.22283873               | 2                         |
| clade24  | 2                    | 0.5       | 0.015328331              | 1                         |
| clade41  | 2                    | 0.5       | 0.022920728              | 1                         |
| clade54  | 2                    | 0.5       | 0.81990329               | 1                         |
| clade55  | 4                    | 0.5       | 0.030180721              | 1                         |
| clade62  | 2                    | 0.5       | 24.41300764              | 9                         |
| clade6   | 26                   | 0.42308   | 14.76349458              | 10                        |
| clade5   | 29                   | 0.41379   | 0.030074956              | 1                         |
| clade59  | 5                    | 0.4       | 10.7864008               | 4                         |
| clade4   | 11                   | 0.36364   | 0.371619485              | 4                         |
| clade14  | 11                   | 0.36364   | 29.79685542              | 8                         |
| clade2   | 28                   | 0.35714   | 1.545260467              | 3                         |
| clade27  | 6                    | 0.33333   | 0.567828167              | 2                         |
| clade37  | 6                    | 0.33333   | 0.174889534              | 1                         |
| clade51  | 3                    | 0.33333   |                          |                           |
